# Supplementary material
Source: publisher figshare collection journal article supplement (https://rs.figshare.com/ndownloader/files/23708496)
Supplement: Supplementary file 1 [file 23708496]

**Supporting information**

**Biology Letters**

**Inference in road ecology research: What we know versus what we think we know**

Fernanda Z. Teixeira, Trina Rytwinski, Lenore Fahrig

Figure S1: PRISMA diagram of the literature search.

Figure S2. Geographic distribution of 307 studies of road effects on wildlife from 46 countries.

Figure S3. Number of negative, positive, and neutral road or traffic effects on wildlife for studies in which estimating road or traffic effects was the main objective (a) and studies having some other main objective but where roads or traffic were included as a covariate (b).

Figure S4. Types of species response variables measured in studies published between 2012 and 2016 assessing the effects of roads and traffic on terrestrial animals. Bars indicate the number of effects measured for each type of response variable. Altogether we found 608 effects, from 307 studies. "Population abundance" includes abundance, density, occurrence, and distribution of single species. "Stress indicators" includes base corticosterone levels and changes in behavior such as vigilance or calling behavior. "Individual space use" refers to lower use of portions of a territory that are closer to a road, while "homing" refers to reduced probability of returning to a territory when translocated across a road. Most measures of species diversity were species richness. "Reproduction, growth and survival" are responses of individual animals, while "Population growth /mean body size" are whole-population responses. "Genetic difference" refers to genetic difference between populations separated by roads (vs. not), while "genetic diversity" refers to genetic diversity of populations living near roads (vs. not).

Figure S5. An observed pattern of lower within-territory space use near a road can be caused by past road mortality. Of those individuals whose territories will overlap with a future road, the ones with the center of activity closer to the road are more likely to be killed by traffic. As we measure space use only after these individuals are already dead, we will observe a pattern of space use that is centered away from the road. This pattern is an artefact of past mortality. Therefore, reduced space use near roads is consistent with road mortality (in addition to reduced habitat quality and reduced connectivity; see text) as a mechanism for impacts of roads on population persistence.

Figure S6. Authors’ inferences about the species responses to roads that are consistent with one, two or all of the three possible mechanisms linking roads to reduced population persistence: decreased connectivity (ovals), increased mortality through road-kill (boxes), and decreased habitat quality (diamonds). Numbers in the shapes are the number of responses for which the authors inferred each mechanism, from our sample of 327 negative responses to roads. Note, the numbers do not add up to 327 responses because authors sometimes inferred more than one possible mechanism for each response (overlap areas in Figure 5b). Empty symbols represent mechanisms that are consistent with measured responses but were never inferred by authors. When all three mechanisms were actually consistent with study results, authors were 2.4 and 2.9 times as likely to infer reduced habitat quality compared to reduced connectivity or increased mortality, respectively. When both reduced connectivity and increased mortality were actually consistent with study results, authors were 5.2 times as likely to infer reduced connectivity compared to increased mortality.

Table S1. Reviewed studies and corresponding results for each study. The three last columns (Mechanisms inferred in the Discussions) were filled only for studies with negative responses to roads or traffic.

Figure S1


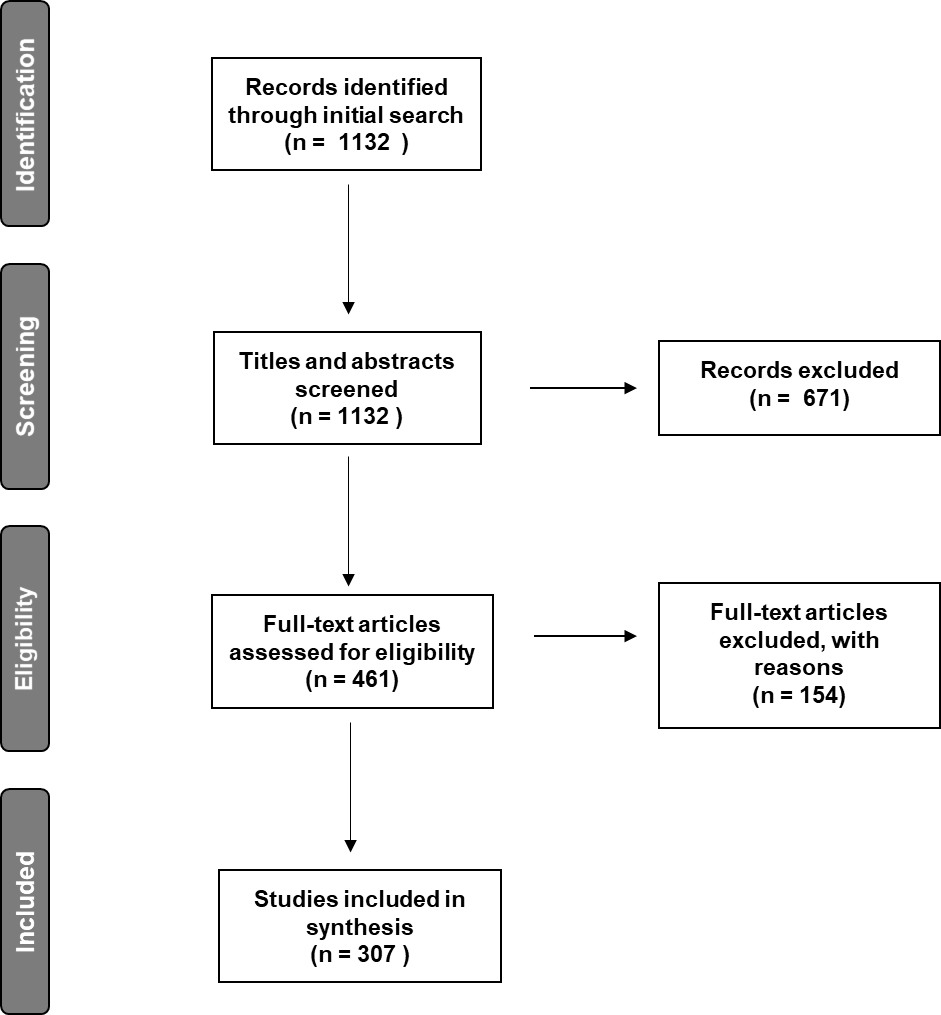


Figure S2


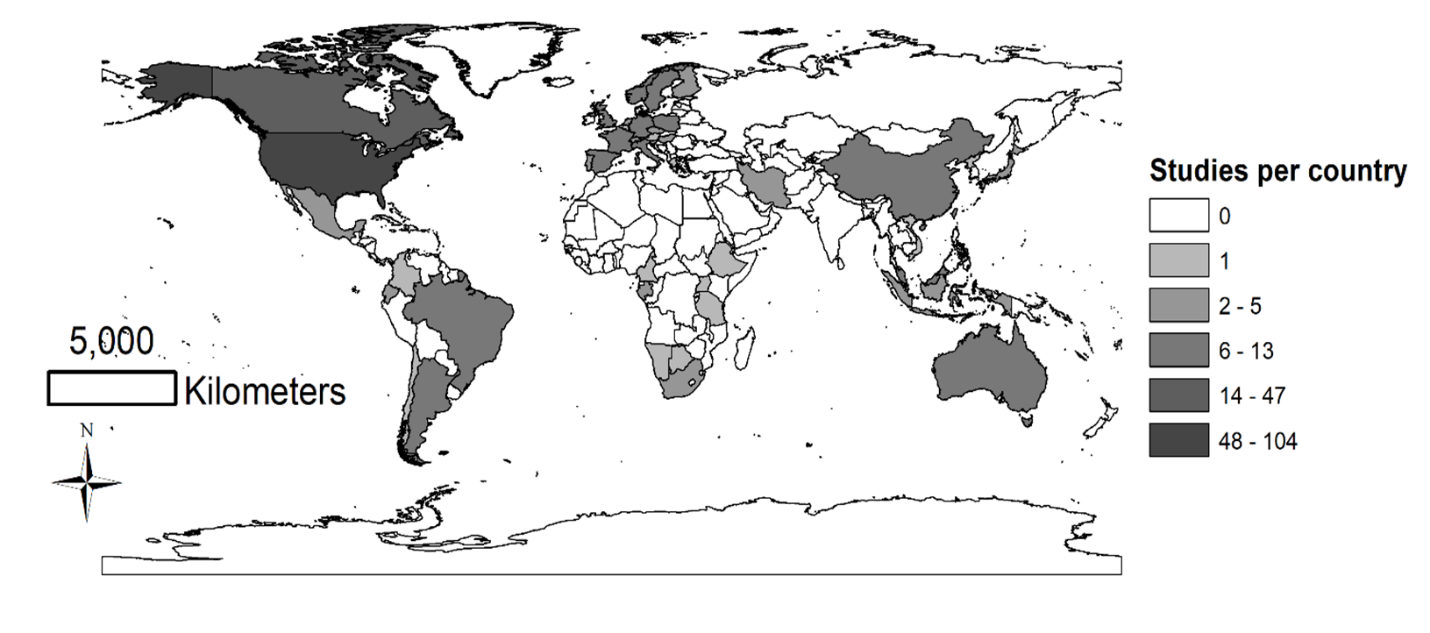


Figure S3

Figure S4


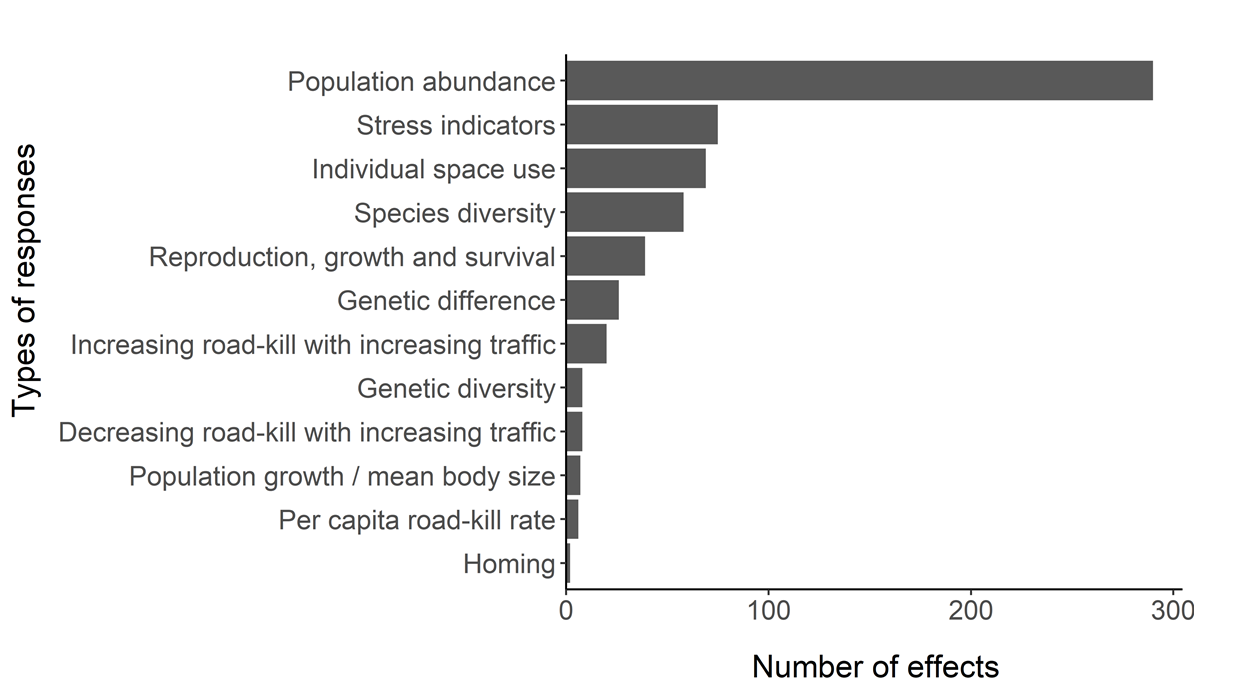


Figure S5


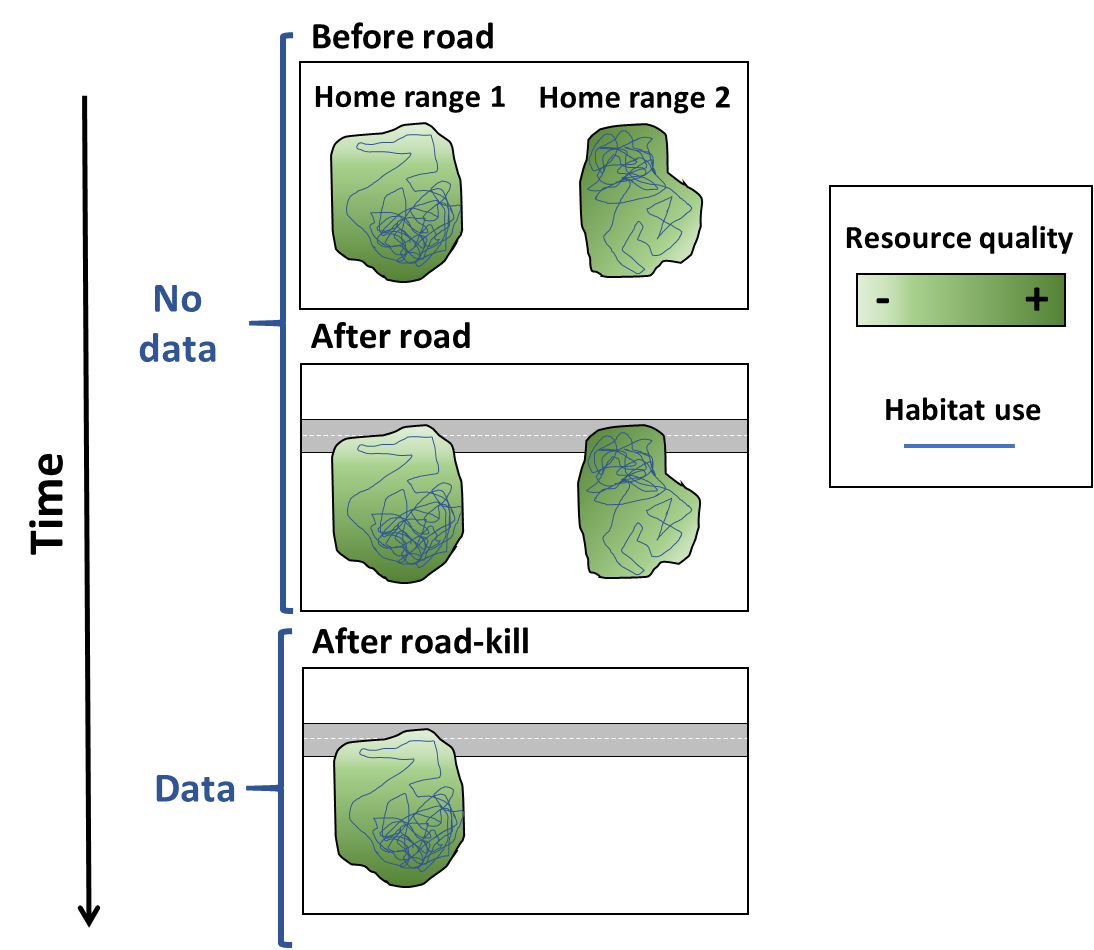


Figure S6


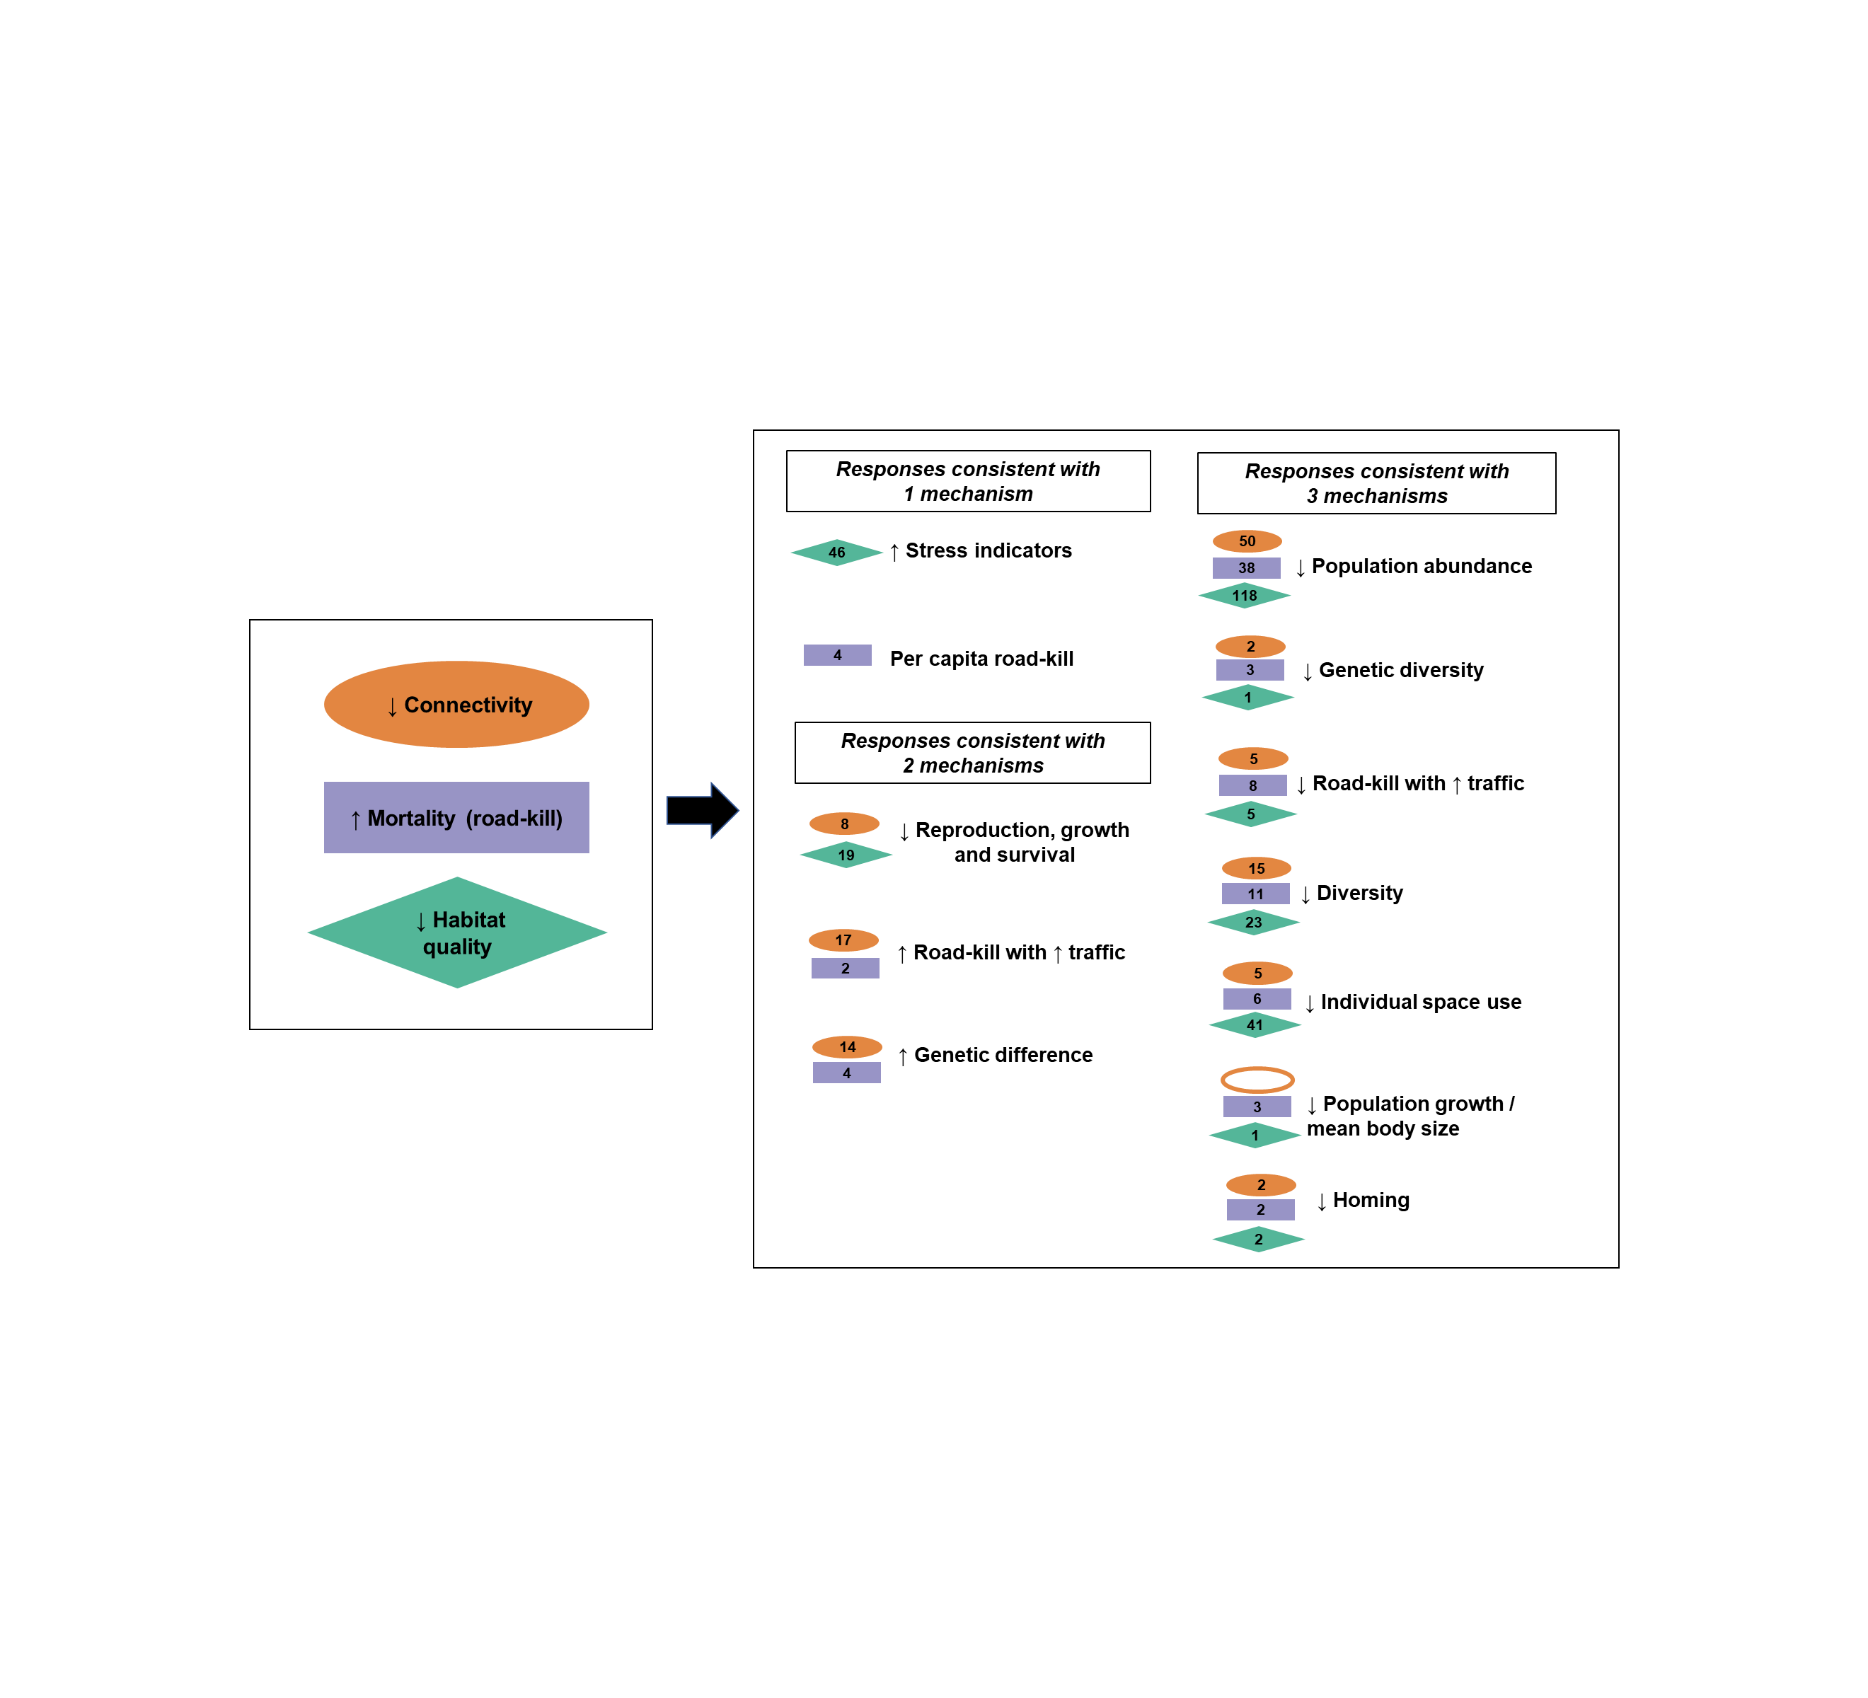


Table S1

| **Citation** | **Taxonomic group** | **Species or group common name** | **Multi or single species response** | **Study country** | **Response category** | **Direction of effect** | **Study focused mainly on roads** | **Mechanisms inferred in the Discussions (1= inferred, 0=not inferred)** | | |
| --- | --- | --- | --- | --- | --- | --- | --- | --- | --- | --- |
|  |  |  |  |  |  |  |  | **Decreased habitat quality** | **Road mortality** | **Decreased connectivity** |
| (Abrahms et al. 2016) | Mammal | African wild dog | Single | Botswana | ↓ Individual space use | Neutral | YES | - | - | - |
| (Abrahms et al. 2016) | Mammal | African wild dog | Single | Botswana | ↓ Individual space use | Positive | YES | - | - | - |
| (Abrahms et al. 2016) | Mammal | African wild dog | Single | Botswana | ↓ Individual space use | Negative | YES | 0 | 0 | 0 |
| (Ahmed et al. 2014) | Birds | Birds | Multi | Brazil | ↓ Diversity | Negative | YES | 1 | 1 | 1 |
| (Al Sayegh Petkovšek et al. 2014) | Mammal | Small mammals | Multi | Slovenia | ↓ Reproduction, growth and survival | Neutral | NO | - | - | - |
| (Amelon et al. 2014) | Mammal | Red bat | Single | USA | ↓ Individual space use | Positive | NO | - | - | - |
| (Astudillo et al. 2014) | Birds | Birds | Multi | Ecuador | ↓ Diversity | Neutral | YES | - | - | - |
| (Azhar et al. 2014) | Birds | Birds | Multi | Malaysia | ↓ Diversity | Negative | NO | 1 | 0 | 0 |
| (Azhar et al. 2015) | Birds | Birds | Multi | Malaysia | ↓ Diversity | Positive | NO | - | - | - |
| (Azhar et al. 2015) | Mammal | Bats | Multi | Malaysia | ↓ Diversity | Positive | NO | - | - | - |
| (Azhar et al. 2015) | Invertebrates | Butterflies | Multi | Malaysia | ↓ Diversity | Neutral | NO | - | - | - |
| (Balkenhol et al. 2014) | Mammal | Cougar | Single | USA | ↑ Genetic difference | Negative | NO | 0 | 0 | 1 |
| (Bani et al. 2015) | Amphibia | Fire salamander | Single | Italy | ↑ Genetic difference | Neutral | YES | - | - | - |
| (Barbar et al. 2015) | Birds | Raptors | Single | Argentina | ↓ Population abundance | Positive | YES | - | - | - |
| (Bart et al. 2013) | Birds | Waterfowl | Single | USA | ↓ Population abundance | Neutral | NO | - | - | - |
| (Bart et al. 2013) | Birds | Loon | Single | USA | ↓ Population abundance | Neutral | NO | - | - | - |
| (Bart et al. 2013) | Birds | Grebes | Single | USA | ↓ Population abundance | Neutral | NO | - | - | - |
| (Bart et al. 2013) | Birds | Shorebirds | Single | USA | ↓ Population abundance | Neutral | NO | - | - | - |
| (Bart et al. 2013) | Birds | Gulls terns | Single | USA | ↓ Population abundance | Neutral | NO | - | - | - |
| (Bart et al. 2013) | Birds | Jaegers | Single | USA | ↓ Population abundance | Neutral | NO | - | - | - |
| (Barthelmess 2014) | Mammal | Mammals | Multi | USA | ↑ Roadkill | Negative | YES | 0 | 1 | 0 |
| (Bartzke et al. 2015) | Mammal | Moose | Single | Norway | ↓ Individual space use | Negative | YES | 1 | 0 | 1 |
| (Baxter-Gilbert et al. 2014) | Reptile | Midland painted turtles | Single | Canada | ↑ stress indicators | Neutral | YES | - | - | - |
| (Beatty et al. 2016) | Mammal | Virginia opossum | Single | USA | ↓ Population abundance | Positive | NO | - | - | - |
| (Beckmann et al. 2015) | Mammal | Black bears | Single | USA | ↓ Population abundance | Positive | NO | - | - | - |
| (Beckmann et al. 2015) | Mammal | Black bears | Single | USA | ↓ Population abundance | Negative | NO | 1 | 0 | 0 |
| (Bellis et al. 2015) | Birds | Birds | Multi | Argentina | ↓ Diversity | Neutral | NO | - | - | - |
| (Beninde et al. 2016) | Reptile | Common wall lizard | Single | Germany | ↑ Genetic difference | Neutral | NO | - | - | - |
| (Bennett et al. 2013) | Mammal | Bats | Multi | USA | ↑ stress indicators | Negative | YES | 1 | 0 | 1 |
| (Bennett et al. 2013) | Mammal | Bats | Multi | USA | ↑ stress indicators | Neutral | YES | - | - | - |
| (Bennett et al. 2013) | Mammal | Bats | Multi | USA | ↓ Individual space use | Negative | YES | 1 | 0 | 1 |
| (Berry et al. 2013) | Reptile | Agassiz's Desert Tortoise | Single | USA | ↓ Population abundance | Negative | NO | 1 | 0 | 0 |
| (Berry et al. 2015) | Reptile | Agassiz’s desert tortoise | Single | USA | ↓ Reproduction, growth and survival | Negative | NO | 1 | 0 | 0 |
| (Berthinussen and Altringham 2012) | Mammal | Bats | Multi | United Kingdom | ↓ Population abundance | Negative | YES | 1 | 1 | 1 |
| (Berthinussen and Altringham 2012) | Mammal | Bats | Multi | United Kingdom | ↓ Diversity | Negative | YES | 1 | 1 | 1 |
| (Beyer et al. 2013) | Mammal | Moose | Single | Canada | ↓ Individual space use | Negative | YES | 1 | 0 | 0 |
| (Beyer et al. 2016) | Mammal | Reindeer | Single | Norway | ↓ Individual space use | Negative | YES | 1 | 0 | 1 |
| (Bled et al. 2015) | Mammal | bobcats | Single | USA | ↓ Population abundance | Negative | NO | 1 | 0 | 0 |
| (Bled et al. 2015) | Mammal | bobcats | Single | USA | ↓ Population abundance | Positive | NO | - | - | - |
| (Blickley et al. 2012) | Birds | Greater Sage-Grouse | Single | USA | ↓ Population abundance | Negative | YES | 1 | 0 | 0 |
| (Bonsen et al. 2015) | Mammal | Fast-flying bats | Multi | Australia | ↓ Population abundance | Positive | YES | - | - | - |
| (Bonsen et al. 2015) | Mammal | Slow-flying bats | Multi | Australia | ↓ Population abundance | Neutral | YES | - | - | - |
| (Bortolamiol et al. 2016) | Mammal | Eastern chimpanzee | Single | Uganda | ↓ Individual space use | Positive | NO | - | - | - |
| (Boulanger et al. 2013) | Mammal | Grizzly bear | Single | Canada | ↓ Reproduction, growth and survival | Positive | NO | - | - | - |
| (Boulanger et al. 2013) | Mammal | Grizzly bear | Single | Canada | ↓ Reproduction, growth and survival | Negative | NO | 0 | 1 | 0 |
| (Braga et al. 2015) | Mammal | Small mammals | Multi | Brazil | ↓ Diversity | Positive | NO | - | - | - |
| (Brehme et al. 2013) | Mammal | San Diego pocket mice | Single | USA | ↓ Individual space use | Negative | YES | 1 | 0 | 1 |
| (Brehme et al. 2013) | Mammal | San Diego pocket mice | Single | USA | ↓ Population abundance | Neutral | YES | - | - | - |
| (Brehme et al. 2013) | Mammal | Cactus mouse | Single | USA | ↓ Individual space use | Negative | YES | 1 | 0 | 1 |
| (Brehme et al. 2013) | Mammal | Cactus mouse | Single | USA | ↓ Population abundance | Neutral | YES | - | - | - |
| (Brehme et al. 2013) | Mammal | Dulzura kangaroo rat | Single | USA | ↓ Individual space use | Positive | YES | - | - | - |
| (Brehme et al. 2013) | Mammal | Deer mouse | Single | USA | ↓ Individual space use | Negative | YES | 1 | 0 | 1 |
| (Brehme et al. 2013) | Reptile | Western fence lizard | Single | USA | ↓ Individual space use | Negative | YES | 1 | 0 | 1 |
| (Brehme et al. 2013) | Reptile | Western fence lizard | Single | USA | ↓ Population abundance | Neutral | YES | - | - | - |
| (Brehme et al. 2013) | Reptile | Orange-throated whiptail | Single | USA | ↓ Individual space use | Negative | YES | 1 | 0 | 1 |
| (Brehme et al. 2013) | Reptile | Orange-throated whiptail | Single | USA | ↓ Individual space use | Neutral | YES | - | - | - |
| (Bright and Holloway 2015) | Mammal | hedgehog | Single | United Kingdom | ↑ Roadkill | Negative | YES | 0 | 1 | 0 |
| (Bright and Holloway 2015) | Mammal | rabbit | Single | United Kingdom | ↑ Roadkill | Negative | YES | 0 | 1 | 0 |
| (Brodie et al. 2015) | Mammal | Clouded leopards | Single | Borneo | ↓ Population abundance | Negative | NO | 0 | 0 | 0 |
| (Brodie et al. 2015) | Mammal | Sambar | Single | Borneo | ↓ Population abundance | Positive | NO | - | - | - |
| (Brodie et al. 2015) | Mammal | Sambar | Single | Borneo | ↓ Population abundance | Neutral | NO | - | - | - |
| (Broman et al. 2014) | Mammal | Bobcat | Single | USA | ↓ Population abundance | Negative | NO | 1 | 0 | 0 |
| (Brown et al. 2012) | Amphibia | Cope's gray tree frog | Single | USA | ↓ Reproduction, growth and survival | Negative | YES | 1 | 0 | 0 |
| (Brown et al. 2012) | Amphibia | Green frog | Single | USA | ↓ Reproduction, growth and survival | Negative | YES | 1 | 0 | 0 |
| (Brzeziński et al. 2012) | Amphibia | Amphibians | Multi | Poland | ↑ Roadkill | Negative | YES | 0 | 1 | 0 |
| (Buchanan et al. 2014) | Mammal | Elk | Single | USA | ↓ Population abundance | Negative | NO | 1 | 0 | 0 |
| (Bunkley and Barber 2015) | Mammal | Pallid bats | Single | USA | ↑ stress indicators | Negative | NO | 1 | 0 | 0 |
| (Butler et al. 2013) | Birds | Golden-cheeked warbler | Single | USA | ↓ Population abundance | Negative | YES | 1 | 0 | 0 |
| (Butler et al. 2013) | Birds | Golden-cheeked warbler | Single | USA | ↑ stress indicators | Negative | YES | 1 | 0 | 0 |
| (Butler et al. 2013) | Birds | Golden-cheeked warbler | Single | USA | ↓ Reproduction, growth and survival | Neutral | YES | - | - | - |
| (Butler et al. 2013) | Birds | White-eyed vireo | Single | USA | ↓ Population abundance | Neutral | YES | - | - | - |
| (Butler et al. 2013) | Birds | White-eyed vireo | Single | USA | ↑ stress indicators | Positive | YES | - | - | - |
| (Butler et al. 2013) | Birds | White-eyed vireo | Single | USA | ↓ Reproduction, growth and survival | Neutral | YES | - | - | - |
| (Byrnes et al. 2012) | Mammal | Long-nosed bandicoot | Single | Australia | ↑ stress indicators | Neutral | YES | - | - | - |
| (Byrnes et al. 2012) | Mammal | Giant white-tailed rat | Single | Australia | ↑ stress indicators | Neutral | YES | - | - | - |
| (Byrnes et al. 2012) | Mammal | Musky rat-kangaroo | Single | Australia | ↑ stress indicators | Neutral | YES | - | - | - |
| (Cao et al. 2015) | Birds | Red-crowned crane | Single | China | ↓ Population abundance | Negative | NO | 1 | 0 | 0 |
| (Cartwright et al. 2014) | Birds | Red-winged black bird | Single | Canada | ↑ stress indicators | Neutral | YES | - | - | - |
| (Cartwright et al. 2014) | Birds | Red-winged black bird | Single | Canada | ↑ stress indicators | Negative | YES | 1 | 0 | 0 |
| (Carvalho et al. 2014) | Vertebrates | Vertebrates | Multi | Brazil | ↑ Roadkill | Negative | YES | 0 | 1 | 0 |
| (Carvalho et al. 2016) | Mammal | Genet | Single | Portugal | ↓ Individual space use | Negative | YES | 0 | 0 | 1 |
| (Cayuela et al. 2015) | Amphibia | Yellow-bellied-toad | Single | France | ↓ Population abundance | Negative | NO | 1 | 1 | 0 |
| (Červinka et al. 2013) | Mammal | Red fox | Single | Czech Republic | ↓ Population abundance | Positive | NO | - | - | - |
| (Červinka et al. 2013) | Mammal | Martens | Single | Czech Republic | ↓ Population abundance | Positive | NO | - | - | - |
| (Červinka et al. 2013) | Mammal | Least weasel | Single | Czech Republic | ↓ Population abundance | Negative | NO | 0 | 0 | 0 |
| (Červinka et al. 2013) | Mammal | Ermine stoat | Single | Czech Republic | ↓ Population abundance | Positive | NO | - | - | - |
| (Červinka et al. 2013) | Mammal | Polecats | Single | Czech Republic | ↓ Population abundance | Neutral | NO | - | - | - |
| (Červinka et al. 2013) | Mammal | European badger | Single | Czech Republic | ↓ Population abundance | Neutral | NO | - | - | - |
| (Červinka et al. 2013) | Mammal | Carnivores | Multi | Czech Republic | ↓ Diversity | Positive | NO | - | - | - |
| (Chen and Koprowski 2015) | Mammal | Mt. Graham red squirrels | Single | USA | ↓ Population abundance | Negative | YES | 1 | 0 | 0 |
| (Chen and Koprowski 2015) | Mammal | Mt. Graham red squirrels | Single | USA | ↓ Individual space use | Negative | YES | 1 | 0 | 0 |
| (Chen and Koprowski 2016) | Mammal | Red squirrel | Single | USA | ↓ Individual space use | Negative | YES | 0 | 0 | 1 |
| (Chen and Koprowski 2016) | Mammal | Red squirrel | Single | USA | ↓ Individual space use | Neutral | YES | - | - | - |
| (Cheveau et al. 2013) | Mammal | Martens | Single | Canada | ↓ Population abundance | Negative | NO | 0 | 0 | 1 |
| (Christie et al. 2015) | Mammal | Pronghorn | Single | USA | ↓ Population abundance | Negative | YES | 0 | 1 | 1 |
| (Clark et al. 2015) | Mammal | American black bear | Single | USA | ↓ Individual space use | Negative | NO | 1 | 0 | 0 |
| (Coe et al. 2015) | Mammal | Mule deer | Single | USA | ↑ Roadkill | Negative | YES | 0 | 1 | 1 |
| (Cosentino et al. 2014) | Amphibia | Anaxyrus americanus | Single | USA | ↓ Population abundance | Negative | YES | 1 | 1 | 1 |
| (Cosentino et al. 2014) | Amphibia | Hyla chrysoscelis/versicolor | Single | USA | ↓ Population abundance | Negative | YES | 1 | 1 | 1 |
| (Cosentino et al. 2014) | Amphibia | Hyla cinerea | Single | USA | ↓ Population abundance | Neutral | YES | - | - | - |
| (Cosentino et al. 2014) | Amphibia | Hyla gratiosa | Single | USA | ↓ Population abundance | Neutral | YES | - | - | - |
| (Cosentino et al. 2014) | Amphibia | Lithobates catesbeianus | Single | USA | ↓ Population abundance | Negative | YES | 1 | 1 | 1 |
| (Cosentino et al. 2014) | Amphibia | Lithobates clamitans | Single | USA | ↓ Population abundance | Negative | YES | 1 | 1 | 1 |
| (Cosentino et al. 2014) | Amphibia | Lithobates palustris | Single | USA | ↓ Population abundance | Negative | YES | 1 | 1 | 1 |
| (Cosentino et al. 2014) | Amphibia | Lithobates sphenocephalus | Single | USA | ↓ Population abundance | Negative | YES | 1 | 1 | 1 |
| (Cosentino et al. 2014) | Amphibia | Lithobates sylvaticus | Single | USA | ↓ Population abundance | Neutral | YES | - | - | - |
| (Cosentino et al. 2014) | Amphibia | Amphibians | Multi | USA | ↓ Diversity | Negative | YES | 1 | 1 | 1 |
| (Cosentino et al. 2014) | Amphibia | Amphibians | Multi | USA | ↓ Diversity | Negative | YES | 1 | 1 | 1 |
| (Costello and Symes 2014) | Invertebrates | Tree crickets (6 species, same genus) | Multi | USA | ↑ stress indicators | Negative | YES | 1 | 0 | 0 |
| (Costello and Symes 2014) | Invertebrates | Tree crickets (6 species, same genus) | Multi | USA | ↑ stress indicators | Neutral | YES | - | - | - |
| (Costello and Symes 2014) | Invertebrates | Tree crickets (6 species, same genus) | Multi | USA | ↑ stress indicators | Neutral | YES | - | - | - |
| (Coster and Kovach 2012) | Mammal | Black bear | Single | USA | ↑ Genetic difference | Negative | NO | 0 | 0 | 1 |
| (Courbin et al. 2014) | Mammal | Caribou | Single | Canada | ↓ Individual space use | Negative | NO | 1 | 0 | 0 |
| (Courbin et al. 2014) | Mammal | Moose | Single | Canada | ↓ Individual space use | Negative | NO | 1 | 0 | 0 |
| (Crawford et al. 2014) | Reptile | Diamondback terrapins | Single | USA | Per capita roadkill | Negative | YES | 0 | 1 | 0 |
| (Cristescu et al. 2014) | Mammal | Grizzly bear | Single | Canada | ↓ Population abundance | Neutral | YES | - | - | - |
| (D’Amico et al. 2016) | Mammal | Red deer | Single | Spain | ↓ Population abundance | Negative | YES | 1 | 0 | 1 |
| (D’Amico et al. 2016) | Mammal | Red deer | Single | Spain | ↓ Population abundance | Negative | YES | 1 | 0 | 1 |
| (D’Amico et al. 2016) | Mammal | Wild boar | Single | Spain | ↓ Population abundance | Negative | YES | 1 | 0 | 1 |
| (D’Amico et al. 2016) | Mammal | Wild boar | Single | Spain | ↓ Population abundance | Neutral | YES | - | - | - |
| (Da Silva et al. 2014) | BIrds | European robin | Single | Germany | ↑ stress indicators | Negative | YES | 1 | 0 | 0 |
| (Da Silva et al. 2014) | BIrds | European robin | Single | Germany | ↑ stress indicators | Negative | YES | 1 | 0 | 0 |
| (Da Silva et al. 2014) | BIrds | Common blackbird | Single | Germany | ↑ stress indicators | Neutral | YES | - | - | - |
| (Da Silva et al. 2014) | BIrds | Common blackbird | Single | Germany | ↑ stress indicators | Negative | YES | 1 | 0 | 0 |
| (Da Silva et al. 2014) | BIrds | Great tit | Single | Germany | ↑ stress indicators | Neutral | YES | - | - | - |
| (Da Silva et al. 2014) | BIrds | Great tit | Single | Germany | ↑ stress indicators | Negative | YES | 1 | 0 | 0 |
| (Da Silva et al. 2014) | BIrds | Blue tit | Single | Germany | ↑ stress indicators | Neutral | YES | - | - | - |
| (Da Silva et al. 2014) | BIrds | Blue tit | Single | Germany | ↑ stress indicators | Negative | YES | 1 | 0 | 0 |
| (Da Silva et al. 2014) | BIrds | Common chaffinch | Single | Germany | ↑ stress indicators | Neutral | YES | - | - | - |
| (Da Silva et al. 2014) | BIrds | Common chaffinch | Single | Germany | ↑ stress indicators | Neutral | YES | - | - | - |
| (Da Silva et al. 2014) | BIrds | Song thrush | Single | Germany | ↑ stress indicators | Neutral | YES | - | - | - |
| (Da Silva et al. 2014) | BIrds | Song thrush | Single | Germany | ↑ stress indicators | Negative | YES | 1 | 0 | 0 |
| (Dahl et al. 2012) | Birds | White-tailed eagles | Single | Norway | ↓ Reproduction, growth and survival | Negative | NO | 1 | 1 | 0 |
| (Dambros et al. 2013) | Invertebrates | Termites | Multi | Brazil | ↓ Diversity | Neutral | YES | - | - | - |
| (Dananay et al. 2015) | Amphibia | wood frog | Single | USA | ↓ Population abundance | Negative | YES | 1 | 0 | 0 |
| (Dananay et al. 2015) | Amphibia | wood frog | Single | USA | ↓ Population growth / mean body size | Positive | YES | - | - | - |
| (Dananay et al. 2015) | Amphibia | wood frog | Single | USA | ↓ Population growth / mean body size | Positive | YES | - | - | - |
| (de Freitas et al. 2014) | Mammal | Giant anteater | Single | Brazil | ↓ Roadkill | Negative | YES | 0 | 1 | 1 |
| (de Groot et al. 2016) | Mammal | Dutch pine martens | Single | Netherlands | ↓ Genetic Diversity | Neutral | NO | - | - | - |
| (de Groot et al. 2016) | Mammal | Dutch pine martens | Single | Netherlands | ↑ Genetic difference | Neutral | NO | - | - | - |
| (de Redon et al. 2015) | Mammal | Small mammals (voles and shrews) | Multi | France | ↓ Diversity | Positive | YES | - | - | - |
| (de Redon et al. 2015) | Mammal | Vole (M. arvalis) | Single | France | ↓ Population abundance | Neutral | YES | - | - | - |
| (de Redon et al. 2015) | Mammal | Shrew (S. coronatus) | Single | France | ↓ Population abundance | Positive | YES | - | - | - |
| (Degregorio et al. 2014) | Birds | Songbirds | Multi | USA | ↓ Reproduction, growth and survival | Negative | NO | 1 | 0 | 0 |
| (Degregorio et al. 2014) | Reptile | Rat snakes and black racers | Multi | USA | ↓ Population abundance | Positive | NO | - | - | - |
| (Delgado et al. 2013) | Invertebrates | Leaf-litter macroinvertebrates | Multi | Canary Islands (Spain) | ↓ Population abundance | Negative | YES | 1 | 0 | 1 |
| (Delgado et al. 2013) | Invertebrates | Leaf-litter macroinvertebrates | Multi | Canary Islands (Spain) | ↓ Diversity | Negative | YES | 1 | 0 | 1 |
| (Dellinger et al. 2013) | Mammal | Red wolves | Single | USA | ↓ Population abundance | Positive | NO | - | - | - |
| (Di Blanco et al. 2015) | Mammal | giant anteater | Single | Argentina | ↓ Population abundance | Neutral | NO | - | - | - |
| (Do and Joo 2015) | Invertebrates | carabid beetles | Multi | Korea | ↓ Diversity | Negative | NO | 1 | 0 | 1 |
| (Do and Joo 2015) | Invertebrates | carabid beetles | Multi | Korea | ↓ Population abundance | Negative | NO | 1 | 0 | 1 |
| (Dobbs et al. 2012) | Amphibia | Cope’s Gray Treefrogs | Single | USA | ↓ Reproduction, growth and survival | Negative | YES | 1 | 0 | 0 |
| (Dolgener et al. 2014) | Amphibia | Fire-bellied-toad | Single | Germany | ↓ Population abundance | Negative | NO | 0 | 1 | 1 |
| (Dolgener et al. 2014) | Amphibia | Fire-bellied-toad | Single | Germany | ↓ Genetic Diversity | Negative | NO | 0 | 1 | 1 |
| (Downing et al. 2015) | Mammal | white-footed mouse | Single | Canada | ↓ Population abundance | Neutral | YES | - | - | - |
| (Drewry et al. 2013) | Mammal | Black bear | Single | USA | ↓ Population abundance | Neutral | NO | - | - | - |
| (Dudaniec et al. 2013) | Mammal | Koala | Single | Australia | ↑ Genetic difference | Negative | NO | 0 | 1 | 1 |
| (Duquette et al. 2015) | Mammal | White-tailed deer | Single | USA | ↓ Individual space use | Positive | NO | - | - | - |
| (Dussault et al. 2012) | Mammal | Caribou | Single | Canada | ↓ Individual space use | Negative | NO | 1 | 0 | 0 |
| (Dziadzio and Jones 2016) | Reptile | Gopher tortoise | Single | USA | ↓ Reproduction, growth and survival | Neutral | NO | - | - | - |
| (Eberhardt et al. 2013) | Amphibia | Anurans | Multi | Canada | ↓ Roadkill | Negative | YES | 0 | 1 | 0 |
| (Eberhardt et al. 2013) | Birds | Birds | Multi | Canada | ↑ Roadkill | Negative | YES | 0 | 1 | 0 |
| (Eberhardt et al. 2013) | Mammal | Small mammals | Multi | Canada | ↑ Roadkill | Neutral | YES | - | - | - |
| (Edwards et al. 2016) | Mammal | African wild cat | Single | Namibia | ↓ Population abundance | Neutral | NO | - | - | - |
| (Eisenberg et al. 2014) | Mammal | Elk | Single | Canada and USA | ↑ stress indicators | Neutral | NO | - | - | - |
| (Ejigu et al. 2015) | Mammal | Walia ibex | Single | Ethiopia | ↓ Population abundance | Positive | NO | - | - | - |
| (Erb et al. 2015) | Reptile | Box turtle | Single | USA | ↓ Population abundance | Positive | NO | - | - | - |
| (Erb et al. 2015) | Reptile | Box turtle | Single | USA | ↓ Population abundance | Positive | NO | - | - | - |
| (Fey et al. 2016) | Mammal | Eurasian red squirrel | Single | Finland | ↓ Individual space use | Negative | YES | 1 | 0 | 1 |
| (Fey et al. 2016) | Mammal | Eurasian red squirrel | Single | Finland | Per capita roadkill | Neutral | YES | - | - | - |
| (Flavenot et al. 2015) | Amphibia | common toad | Single | France | ↓ Genetic Diversity | Negative | NO | 0 | 1 | 1 |
| (Flavenot et al. 2015) | Amphibia | natterjack toad | Single | France | ↓ Genetic Diversity | Neutral | NO | - | - | - |
| (Fortney et al. 2012) | Reptile | Snakes | Multi | Canada | ↑ Roadkill | Negative | YES | 0 | 1 | 0 |
| (Fortney et al. 2012) | Reptile | Snakes | Multi | Canada | ↓ Population abundance | Neutral | YES | - | - | - |
| (Fortney et al. 2012) | Reptile | Snakes | Multi | Canada | ↓ Individual space use | Positive | YES | - | - | - |
| (Frakes et al. 2015) | Mammal | Florida panther | Single | USA | ↓ Population abundance | Negative | NO | 1 | 0 | 1 |
| (Francis 2015) | Birds | birds | Multi | USA, Puerto Rico, Netherlands, Canada, Finland, Spain, Switzerland, Germany | ↓ Population abundance | Negative | YES | 1 | 0 | 0 |
| (Francis et al. 2015) | Mammal | Squirrel glider | Single | Australia | ↓ Population abundance | Negative | YES | 1 | 0 | 1 |
| (Francis et al. 2015) | Mammal | Squirrel glider | Single | Australia | ↓ Population abundance | Negative | YES | 1 | 0 | 1 |
| (Francis et al. 2015) | Mammal | Squirrel glider | Single | Australia | ↓ Population abundance | Negative | YES | 1 | 0 | 1 |
| (Frantz et al. 2012) | Mammal | Red deer | Single | Belgium | ↑ Genetic difference | Negative | YES | 0 | 0 | 1 |
| (Frantz et al. 2012) | Mammal | Wild boar | Single | Belgium | ↑ Genetic difference | Neutral | YES | - | - | - |
| (Freitas et al. 2012) | Mammal | Small mammals (forest specialists) | Multi | Brazil | ↓ Population abundance | Negative | YES | 1 | 1 | 1 |
| (Freitas et al. 2012) | Mammal | Small mammals (habitat generalists) | Multi | Brazil | ↓ Population abundance | Negative | YES | 1 | 1 | 1 |
| (Froese et al. 2015) | Mammal | Anoa | Single | Indonesia | ↓ Population abundance | Positive | NO | - | - | - |
| (Froese et al. 2015) | Mammal | Booted macaque | Single | Indonesia | ↓ Population abundance | Negative | NO | 1 | 0 | 0 |
| (Froese et al. 2015) | Birds | Red jungle fowl | Single | Indonesia | ↓ Population abundance | Negative | NO | 1 | 0 | 0 |
| (Froese et al. 2015) | Mammal | Sulawesi warty pig | Single | Indonesia | ↓ Population abundance | Neutral | NO | - | - | - |
| (Gabrielsen et al. 2013) | Amphibia | Wood frog | Single | USA | ↑ Genetic difference | Negative | NO | 1 | 1 | 1 |
| (Gagné et al. 2015) | Birds | barred owl | Single | USA | ↑ Roadkill | Negative | YES | 0 | 1 | 0 |
| (Gastón et al. 2016) | Mammal | Iberian lynx | Single | Spain and Portugal | ↓ Individual space use | Negative | NO | 0 | 0 | 0 |
| (Gastón et al. 2016) | Mammal | Iberian lynx | Single | Spain and Portugal | ↓ Individual space use | Neutral | NO | - | - | - |
| (Geiser et al. 2013) | Invertebrates | Slow worms | Single | Switzerland | ↑ Genetic difference | Negative | NO | 0 | 0 | 1 |
| (Gillan et al. 2013) | Birds | Sage-grouse | Single | USA | ↓ Individual space use | Neutral | YES | - | - | - |
| (Grace and Anderson 2015) | Birds | Carolina chickadee | Single | USA | ↑ stress indicators | Neutral | YES | - | - | - |
| (Granados et al. 2012) | Mammal | Elephant | Single | Cameroon | ↓ Individual space use | Negative | NO | 1 | 0 | 1 |
| (Gravel et al. 2012) | Amphibia | Mole salamanders | Single | Canada | ↓ Population abundance | Negative | YES | 0 | 0 | 1 |
| (Gravel et al. 2012) | Amphibia | American toads | Single | Canada | ↓ Population abundance | Neutral | YES | - | - | - |
| (Gravel et al. 2012) | Amphibia | Green frogs | Single | Canada | ↓ Population abundance | Negative | YES | 1 | 1 | 0 |
| (Gravel et al. 2012) | Amphibia | Wood frogs | Single | Canada | ↓ Population abundance | Negative | YES | 1 | 0 | 1 |
| (Green and Bailey 2015) | Amphibia | Wood frog | Single | USA | ↓ Reproduction, growth and survival | Negative | NO | 1 | 0 | 0 |
| (Grilo et al. 2014) | Birds | Barn owls | Single | Portugal | ↓ Population abundance | Negative | YES | 1 | 1 | 0 |
| (Grilo et al. 2014) | Birds | Tawny owls | Single | Portugal | ↓ Population abundance | Neutral | YES | - | - | - |
| (Grilo et al. 2014) | Birds | Little owls | Single | Portugal | ↓ Population abundance | Neutral | YES | - | - | - |
| (Grilo et al. 2014) | Birds | Barn owls | Single | Portugal | ↑ Roadkill | Negative | YES | 0 | 1 | 0 |
| (Grilo et al. 2014) | Birds | Tawny owls | Single | Portugal | ↑ Roadkill | Neutral | YES | - | - | - |
| (Grilo et al. 2014) | Birds | Little owls | Single | Portugal | ↑ Roadkill | Neutral | YES | - | - | - |
| (Grilo et al. 2015) | Birds | Barn owl | Single | Portugal | ↓ Roadkill | Negative | YES | 1 | 1 | 1 |
| (Grilo et al. 2015) | Mammal | Hedgehog | Single | Portugal | ↓ Roadkill | Negative | YES | 1 | 1 | 1 |
| (Grilo et al. 2015) | Mammal | Rabbit | Single | Portugal | ↓ Roadkill | Negative | YES | 1 | 1 | 1 |
| (Grilo et al. 2015) | Mammal | Red fox | Single | Portugal | ↓ Roadkill | Negative | YES | 1 | 1 | 1 |
| (Grilo et al. 2016) | Mammal | Southern water vole | Single | Spain | ↓ Genetic Diversity | Neutral | YES | - | - | - |
| (Grilo et al. 2016) | Mammal | Southern water vole | Single | Spain | ↑ Genetic difference | Neutral | YES | - | - | - |
| (Grilo et al. 2016) | Mammal | Mediterranean pine vole | Single | Spain | ↓ Genetic Diversity | Neutral | YES | - | - | - |
| (Grilo et al. 2016) | Mammal | Mediterranean pine vole | Single | Spain | ↑ Genetic difference | Neutral | YES | - | - | - |
| (Grilo et al. 2016) | Mammal | Algerian mouse | Single | Spain | ↓ Genetic Diversity | Neutral | YES | - | - | - |
| (Grilo et al. 2016) | Mammal | Algerian mouse | Single | Spain | ↑ Genetic difference | Neutral | YES | - | - | - |
| (Grubb et al. 2013) | Birds | Northern goshawk | Single | USA | ↑ stress indicators | Neutral | YES | - | - | - |
| (Halfwerk et al. 2012) | Birds | Great tit | Single | Netherlands | ↑ stress indicators | Negative | YES | 1 | 0 | 0 |
| (Hamer 2016) | Anuran | Anuran | Multi | Australia | ↓ Diversity | Neutral | Yes | - | - | - |
| (Hamer 2016) | Anuran | Anuran | Multi | Australia | ↓ Diversity | Negative | Yes | 1 | 1 | 1 |
| (Hamer et al. 2016) | Reptile | Common long-necked turtle | Single | Australia | ↓ Population growth / mean body size | Positive | YES | - | - | - |
| (Hamer et al. 2016) | Reptile | Common long-necked turtle | Single | Australia | ↓ Population growth / mean body size | Neutral | YES | - | - | - |
| (Hanley and Wilkins 2015) | Invertebrates | bumblebees | Multi | England | ↓ Population abundance | Positive | YES | - | - | - |
| (Harris et al. 2014) | Mammal | Moose | Single | USA | ↓ Population abundance | Negative | NO | 1 | 0 | 0 |
| (Hasegawa et al. 2015) | Invertebrates | Collembola | Multi | Japan | ↓ Population abundance | Negative | YES | 1 | 0 | 0 |
| (Hasegawa et al. 2015) | Invertebrates | Collembola | Multi | Japan | ↓ Diversity | Negative | YES | 1 | 0 | 0 |
| (Haskell et al. 2013) | Mammal | Carnivores | Multi | USA | ↓ Population abundance | Negative | NO | 0 | 0 | 1 |
| (Haurez et al. 2018) | Mammal | Western lowland gorilla | Single | Gabon | ↓ Population abundance | Negative | NO | 1 | 0 | 0 |
| (Haurez et al. 2018) | Mammal | Western lowland gorilla | Single | Gabon | ↓ Population abundance | Neutral | NO | - | - | - |
| (Heurich et al. 2012) | Mammal | Roe Deer | Single | Germany and Czech Republic | Per capita roadkill | Negative | NO | 0 | 0 | 0 |
| (Hof and Bright 2012) | Mammal | Hedgehog | Single | Great Britain | ↓ Population abundance | Positive | NO | - | - | - |
| (Holá et al. 2015) | Birds | Ring necked pheasant | Single | Czech Republic | ↓ Population abundance | Negative | NO | 0 | 1 | 0 |
| (Holbrook et al. 2015) | Birds | Red-naped sapsuckers | Single | USA | ↓ Population abundance | Positive | NO | - | - | - |
| (Holloran et al. 2015) | Birds | Greater sage-grouse | Single | USA | ↓ Population abundance | Negative | NO | 1 | 0 | 0 |
| (Holzer 2014) | Amphibia | Amphibians | Multi | USA | ↓ Diversity | Neutral | NO | - | - | - |
| (Hopkins et al. 2013) | Amphibia | Rough-skinned newt | Single | USA | ↓ Reproduction, growth and survival | Negative | YES | 1 | 0 | 0 |
| (Hosaka et al. 2014) | Invertebrates | Dung beetle | Multi | Malaysia | ↓ Diversity | Negative | NO | 1 | 0 | 1 |
| (Hovick et al. 2015) | Birds | Prairie Grouse | Single | USA | ↓ Population abundance | Negative | NO | 1 | 0 | 0 |
| (Hovick et al. 2015) | Birds | Prairie Grouse | Single | USA | ↓ Population abundance | Negative | NO | 1 | 0 | 0 |
| (Hu et al. 2016) | Birds | Crested ibis | Single | China | ↓ Population abundance | Negative | NO | 1 | 0 | 0 |
| (Hubbard et al. 2016) | Reptile | Northern Sagebrush Lizards and Plateau Fence Lizards (same genus) | Multi | USA | ↓ Population abundance | Neutral | YES | - | - | - |
| (Hubbard et al. 2016) | Reptile | Greater Short-Horned Lizards | Single | USA | ↓ Population abundance | Neutral | YES | - | - | - |
| (Husby and Husby 2014) | Birds | Birds | Multi | Norway | ↑ stress indicators | Negative | YES | 1 | 0 | 0 |
| (Jack et al. 2015) | Birds | Birds | Multi | Canada | ↓ Population abundance | Negative | YES | 0 | 1 | 0 |
| (Jerina 2012) | Mammal | Red deer | Single | Slovenia | ↓ Individual space use | Negative | NO | 1 | 0 | 1 |
| (Jiang et al. 2014) | Mammal | Amur tiger | Single | China | ↓ Population abundance | Negative | NO | 1 | 1 | 1 |
| (Johnson et al. 2013) | Vertebrates | Vertebrates | Multi | USA | ↓ Diversity | Negative | NO | 0 | 0 | 1 |
| (Johnson et al. 2013) | Invertebrates | Invertebrates | Multi | USA | ↓ Diversity | Negative | NO | 0 | 0 | 1 |
| (Johnson et al. 2015) | Mammal | Caribou | Single | Canada | ↓ Population abundance | Negative | NO | 1 | 0 | 0 |
| (Jongsma et al. 2014) | Amphibia | Amphibians | Multi | Ecuador | ↓ Diversity | Negative | NO | 0 | 0 | 0 |
| (Kaiser et al. 2015) | Amphibia | White's treefrog | Single | USA | ↑ stress indicators | Negative | YES | 1 | 0 | 0 |
| (Kaiser et al. 2015) | Amphibia | White's treefrog | Single | USA | ↓ Reproduction, growth and survival | Negative | YES | 1 | 0 | 0 |
| (Kaiser et al. 2015) | Amphibia | White's treefrog | Single | USA | ↓ Reproduction, growth and survival | Negative | YES | 1 | 0 | 0 |
| (Kambourova-Ivanova et al. 2012) | Vertebrates | Vertebrates | Multi | Bulgaria | ↓ Roadkill | Negative | NO | 0 | 1 | 0 |
| (Kaminski and Islam 2013) | Birds | Cerulean Warblers | Single | USA | ↓ Population abundance | Positive | NO | - | - | - |
| (Kang et al. 2014) | Mammal | Panda | Single | China | ↓ Population abundance | Negative | YES | 1 | 0 | 0 |
| (Karelus et al. 2016) | Mammal | Black bear | Single | USA | ↓ Individual space use | Positive | NO | - | - | - |
| (Karelus et al. 2016) | Mammal | Black bear | Single | USA | ↓ Individual space use | Negative | NO | 1 | 0 | 0 |
| (Kaunert and McBrayer 2015) | Reptile | Florida Scrub Lizard | Single | USA | ↓ Population abundance | Positive | NO | - | - | - |
| (Keret et al. 2015) | Invertebrates | Egyptian cotton leaf worm moth | single | Israel | ↓ Homing | Negative | YES | 1 | 1 | 1 |
| (Kern and Radford 2016) | Mammal | Dwarf mongooses | Single | South Africa | ↑ stress indicators | Negative | YES | 1 | 0 | 0 |
| (Kern and Radford 2016) | Mammal | Dwarf mongooses | Single | South Africa | ↑ stress indicators | Negative | YES | 1 | 0 | 0 |
| (Khaleghizadeh and Anuar 2014) | Birds | Brahminy kite | Single | Malaysia | ↓ Population abundance | Negative | NO | 1 | 0 | 0 |
| (Kouffeld et al. 2013) | Birds | Ruffed grouse | Single | USA | ↓ Population abundance | Negative | NO | 1 | 0 | 0 |
| (Kowal and Cartar 2012) | Invertebrates | Spiders | Multi | Canada | ↓ Diversity | Neutral | NO | - | - | - |
| (Kowal and Cartar 2012) | Invertebrates | Spiders | Multi | Canada | ↓ Population abundance | Neutral | NO | - | - | - |
| (Kowalski et al. 2015) | Mammal | Medium-sized carnivores | Single | USA | ↓ Population abundance | Neutral | NO | - | - | - |
| (Kowalski et al. 2015) | Mammal | Gray fox | Single | USA | ↓ Population abundance | Neutral | NO | - | - | - |
| (Kowalski et al. 2015) | Mammal | Raccon | Single | USA | ↓ Population abundance | Negative | NO | 1 | 0 | 0 |
| (Kowalski et al. 2015) | Mammal | Stripped-skunk | Single | USA | ↓ Population abundance | Neutral | NO | - | - | - |
| (Kowalski et al. 2015) | Mammal | Bobcat | Single | USA | ↓ Population abundance | Neutral | NO | - | - | - |
| (Lampe et al. 2012) | Invertebrates | Grasshopper | Single | Germany | ↑ stress indicators | Negative | YES | 1 | 0 | 0 |
| (Laporte and Beaudry 2013) | Reptile | Painted turtles | Single | Canada | ↓ Genetic Diversity | Negative | YES | 1 | 1 | 0 |
| (Laporte and Beaudry 2013) | Reptile | Painted turtles | Single | Canada | ↓ Population abundance | Negative | YES | 1 | 1 | 0 |
| (Laurence et al. 2013) | Mammal | Muskrat | Single | Canada | ↑ Genetic difference | Positive | NO | - | - | - |
| (Lawes et al. 2012) | Mammal | Pygmy rabbit | Single | USA | ↓ Homing | Negative | NO | 1 | 1 | 1 |
| (Lawes et al. 2012) | Mammal | Pygmy rabbit | Single | USA | ↓ Reproduction, growth and survival | Negative | NO | 1 | 1 | 1 |
| (Leblond et al. 2013) | Mammal | Caribou | Single | Canada | ↓ Individual space use | Negative | YES | 1 | 0 | 1 |
| (Leblond et al. 2013) | Mammal | Caribou | Single | Canada | ↓ Population abundance | Negative | YES | 1 | 0 | 1 |
| (Leblond et al. 2015) | Mammal | Moose | Single | Canada | ↓ Population abundance | Negative | NO | 1 | 0 | 0 |
| (Leclerc et al. 2012) | Mammal | Moose | Single | Canada | ↓ Population abundance | Negative | NO | 1 | 0 | 0 |
| (Lee et al. 2012) | Mammal | Bobcat | Single | USA | ↑ Genetic difference | Negative | YES | 0 | 0 | 1 |
| (Legagneux and Ducatez 2013) | Birds | European birds | Multi | France | ↑ stress indicators | Negative | YES | 1 | 0 | 0 |
| (Lin 2015) | Mammal | Small mammals | Multi | China | ↓ Population abundance | Positive | YES | - | - | - |
| (Lin 2015) | Invertebrates | Invertebrates | Multi | China | ↓ Population abundance | Positive | YES | - | - | - |
| (Lin 2015) | Amphibia | Amphibians | Multi | China | ↓ Population abundance | Negative | YES | 1 | 0 | 0 |
| (Lin et al. 2015) | Reptile | Chinese Pond Turtle | Single | China | ↓ Population abundance | Negative | NO | 1 | 1 | 0 |
| (Litvaitis et al. 2015) | Mammal | Bobcat | Single | USA | ↑ Roadkill | Negative | YES | 0 | 1 | 0 |
| (Litvaitis et al. 2015) | Mammal | Bobcat | Single | USA | ↓ Individual space use | Negative | YES | 1 | 0 | 0 |
| (Litvaitis et al. 2015) | Mammal | Bobcat | Single | USA | ↑ Genetic difference | Negative | YES | 0 | 0 | 1 |
| (Llaneza et al. 2012) | Mammal | Wolf | Single | Spain | ↓ Population abundance | Negative | NO | 0 | 0 | 0 |
| (Ludlow et al. 2015) | Birds | Savannah Sparrow | Single | Canada | ↓ Population abundance | Negative | NO | 1 | 0 | 0 |
| (Ludlow et al. 2015) | Birds | Western Meadowlark | Single | Canada | ↓ Population abundance | Negative | NO | 1 | 0 | 0 |
| (Ludlow et al. 2015) | Birds | Baird’s Sparrows | Single | Canada | ↓ Population abundance | Negative | NO | 1 | 0 | 0 |
| (Ludlow et al. 2015) | Birds | Vesper sparrows | Single | Canada | ↓ Population abundance | Neutral | NO | - | - | - |
| (Ludlow et al. 2015) | Birds | Sprague’s Pipits | Single | Canada | ↓ Population abundance | Neutral | NO | - | - | - |
| (Ludlow et al. 2015) | Birds | Birds | Multi | Canada | ↓ Reproduction, growth and survival | Neutral | NO | - | - | - |
| (Luepold et al. 2015) | Birds | Rusty Blackbirds | Single | USA | ↓ Reproduction, growth and survival | Neutral | NO | - | - | - |
| (Lukanov et al. 2014) | Amphibia | Marsh Frog | Single | Bulgaria | ↓ Individual space use | Negative | YES | 1 | 0 | 0 |
| (Lukanov et al. 2014) | Amphibia | Marsh Frog | Single | Bulgaria | ↑ stress indicators | Negative | YES | 1 | 0 | 0 |
| (Lunde et al. 2016) | Mammal | Impala | Single | Tanzania | ↑ stress indicators | Negative | YES | 1 | 0 | 0 |
| (Luo et al. 2015) | Mammal | Daubenton’s bat | Single | Germany | ↑ stress indicators | Negative | YES | 1 | 0 | 0 |
| (Luther and Derryberry 2012) | Birds | White-crowned sparrow | Single | USA | ↑ stress indicators | Negative | NO | 1 | 0 | 0 |
| (Luther and Derryberry 2012) | Birds | White-crowned sparrow | Single | USA | ↑ stress indicators | Neutral | NO | - | - | - |
| (Mammides et al. 2015) | Birds | Birds | Multi | Cyprus | ↓ Diversity | Negative | YES | 1 | 0 | 1 |
| (Mammides et al. 2016) | Birds | Birds | Multi | Cyprus | ↓ Diversity | Negative | YES | 1 | 0 | 0 |
| (Manikowska-Ślepowrońska et al. 2015) | Birds | Grey Herons | Single | Poland | ↓ Population abundance | Negative | NO | 1 | 0 | 0 |
| (Manikowska-Ślepowrońska et al. 2016) | Birds | Grey Heron | Single | Poland | ↓ Reproduction, growth and survival | Negative | NO | 1 | 0 | 0 |
| (Marshall et al. 2012) | Birds | Golden-cheeked warbler | Single | USA | ↓ Population abundance | Neutral | NO | - | - | - |
| (Marshall et al. 2012) | Birds | Golden-cheeked warbler | Single | USA | ↓ Reproduction, growth and survival | Neutral | NO | - | - | - |
| (Maynard et al. 2016) | Reptile | Reptiles | Multi | Ecuador | ↓ Diversity | Negative | YES | 1 | 0 | 0 |
| (Maynard et al. 2016) | Amphibia | Amphibians | Multi | Ecuador | ↓ Diversity | Negative | YES | 1 | 0 | 0 |
| (McCleery et al. 2015) | Mammal | Mammals | Multi | USA | ↓ Diversity | Neutral | YES | - | - | - |
| (McCleery et al. 2015) | Birds | Birds | Multi | USA | ↓ Diversity | Negative | YES | 1 | 1 | 0 |
| (Mcclure et al. 2013) | Birds | Birds | Multi | USA | ↓ Population abundance | Negative | YES | 1 | 0 | 0 |
| (McLaughlin and Kunc 2013) | Birds | European robin | Single | Northern Ireland | ↑ stress indicators | Negative | YES | 1 | 0 | 0 |
| (McLaughlin and Kunc 2013) | Birds | European robin | Single | Northern Ireland | ↑ stress indicators | Negative | YES | 1 | 0 | 0 |
| (Meillère et al. 2015a) | Birds | House sparrow | Single | France | ↓ Population abundance | Neutral | YES | - | - | - |
| (Meillère et al. 2015a) | Birds | House sparrow | Single | France | ↑ stress indicators | Negative | YES | 1 | 0 | 0 |
| (Meillère et al. 2015a) | Birds | House sparrow | Single | France | ↓ Reproduction, growth and survival | Neutral | YES | - | - | - |
| (Meillère et al. 2015b) | Birds | House sparrow | Single | France | ↓ Reproduction, growth and survival | Negative | YES | 1 | 0 | 0 |
| (Meillère et al. 2015b) | Birds | House sparrow | Single | France | ↓ Reproduction, growth and survival | Neutral | YES | - | - | - |
| (Meillère et al. 2015b) | Birds | House sparrow | Single | France | ↑ stress indicators | Neutral | YES | - | - | - |
| (Meisingset et al. 2013) | Mammal | Red deer | Single | Norway | ↓ Individual space use | Negative | YES | 1 | 0 | 0 |
| (Meisingset et al. 2013) | Mammal | Red deer | Single | Norway | ↓ Individual space use | Neutral | YES | - | - | - |
| (Meisingset et al. 2014) | Mammal | Red deer | Single | Norway | ↑ Roadkill | Negative | YES | 0 | 1 | 0 |
| (Millar and Blouin-Demers 2012) | Reptile | Blanding’s turtle | Single | Canada | ↓ Population abundance | Negative | NO | 0 | 1 | 1 |
| (Montague et al. 2013) | Birds | European robin | Single | Northern Ireland | ↑ stress indicators | Negative | NO | 1 | 0 | 0 |
| (Montgomery et al. 2012) | Mammal | Elk | Single | USA | ↓ Individual space use | Negative | YES | 1 | 0 | 0 |
| (Moreau et al. 2012) | Mammal | Forest-dwelling caribou | Single | Canada | ↓ Individual space use | Negative | NO | 1 | 0 | 0 |
| (Moreau et al. 2012) | Mammal | Forest-dwelling caribou | Single | Canada | ↓ Population abundance | Negative | NO | 1 | 0 | 0 |
| (Moreira-Arce et al. 2015) | Mammal | Kodkod cat | Single | Chile | ↓ Population abundance | Neutral | NO | - | - | - |
| (Moreira-Arce et al. 2015) | Mammal | Chilla fox | Single | Chile | ↓ Population abundance | Neutral | NO | - | - | - |
| (Moreira-Arce et al. 2015) | Mammal | Lesser grison | Single | Chile | ↓ Population abundance | Neutral | NO | - | - | - |
| (Moreira-Arce et al. 2015) | Mammal | Culpeo fox | Single | Chile | ↓ Population abundance | Negative | NO | 1 | 1 | 1 |
| (Moreira-Arce et al. 2015) | Mammal | Darwin's fox | Single | Chile | ↓ Population abundance | Negative | NO | 1 | 1 | 1 |
| (Moreira-Arce et al. 2015) | Mammal | Cougar | Single | Chile | ↓ Population abundance | Negative | NO | 1 | 1 | 1 |
| (Moreira-Arce et al. 2015) | Mammal | Skunk | Single | Chile | ↓ Population abundance | Negative | NO | 1 | 1 | 1 |
| (Morelli 2013) | Birds | Red-backed Shrike | Single | Italy | ↓ Population abundance | Positive | YES | - | - | - |
| (Morelli et al. 2012) | Birds | Red-backed shrikes | Single | Italy | ↓ Population abundance | Neutral | NO | - | - | - |
| (Morelli et al. 2015a) | Birds | 38 bird species | Single | Italy | ↓ Population abundance | Neutral | YES | - | - | - |
| (Morelli et al. 2015a) | Birds | 17 bird species | Single | Italy | ↓ Population abundance | Positive | YES | - | - | - |
| (Morelli et al. 2015a) | Birds | 6 bird species | Single | Italy | ↓ Population abundance | Negative | YES | 0 | 0 | 0 |
| (Morelli et al. 2015b) | Birds | Red-backed Shrike | Single | Italy and Poland | ↓ Reproduction, growth and survival | Positive | NO | - | - | - |
| (Morelli et al. 2015b) | Birds | Red-backed Shrike | Single | Italy and Poland | ↓ Reproduction, growth and survival | Neutral | NO | - | - | - |
| (Morovati et al. 2014) | Mammal | Wild goat | Single | Iran | ↓ Population abundance | Neutral | NO | - | - | - |
| (Morovati et al. 2015) | Mammal | Cheetah | Single | Iran | ↓ Population abundance | Negative | NO | 0 | 1 | 0 |
| (Mulero-Pázmány et al. 2016) | Mammal | Impala | Single | South Africa | ↑ stress indicators | Neutral | YES | - | - | - |
| (Mulero-Pázmány et al. 2016) | Mammal | Impala | Single | South Africa | ↓ Population abundance | Negative | YES | 1 | 0 | 1 |
| (Muller et al. 2014) | Mammal | White-tailed deer | Single | USA | ↑ Roadkill | Negative | YES | 0 | 1 | 0 |
| (Munguia-vega et al. 2013) | Reptile | Black-tailed brush lizard | Single | Mexico | ↑ Genetic difference | Negative | NO | 0 | 1 | 1 |
| (Munro et al. 2012) | Mammal | White-tailed deer | Single | USA and Canada | Per capita roadkill | Negative | YES | 0 | 1 | 0 |
| (Munro et al. 2012) | Mammal | White-tailed deer | Single | USA and Canada | ↓ Population abundance | Positive | YES | - | - | - |
| (Munshi-South 2012) | Mammal | White-footed mouse | Single | USA | ↑ Genetic difference | Positive | NO | - | - | - |
| (Murrieta-Galindo et al. 2013) | Amphibia | Amphibians | Multi | Mexico | ↓ Diversity | Neutral | NO | - | - | - |
| (Murrow et al. 2013) | Mammal | Florida panther (puma) | Single | USA | ↓ Population abundance | Negative | NO | 1 | 1 | 1 |
| (Mustonen et al. 2012) | Mammal | Racoon dog | Single | Finland | ↓ Individual space use | Positive | NO | - | - | - |
| (Mutter et al. 2015) | Birds | Brewer’s Sparrows | Single | USA | ↓ Population abundance | Neutral | NO | - | - | - |
| (Mutter et al. 2015) | Birds | Sagebrush Sparrow | Single | USA | ↓ Population abundance | Neutral | NO | - | - | - |
| (Mutter et al. 2015) | Birds | Brewer’s Sparrows | Single | USA | ↓ Population abundance | Neutral | NO | - | - | - |
| (Mutter et al. 2015) | Birds | Sagebrush Sparrow | Single | USA | ↓ Population abundance | Negative | NO | 1 | 0 | 1 |
| (Mutter et al. 2015) | Birds | Sage Thrasher | Single | USA | ↓ Population abundance | Negative | NO | 1 | 0 | 1 |
| (Nafus et al. 2013) | Reptile | Agassiz’s desert tortoise | Single | USA | ↓ Population abundance | Negative | YES | 1 | 1 | 0 |
| (Nafus et al. 2013) | Reptile | Agassiz’s desert tortoise | Single | USA | ↓ Population abundance | Negative | YES | 0 | 1 | 0 |
| (Nakabayashi et al. 2014) | Mammal | Common palm civet | Single | Malaysia | ↓ Population abundance | Positive | YES | - | - | - |
| (Nakabayashi et al. 2014) | Mammal | Common palm civet | Single | Malaysia | ↓ Individual space use | Positive | YES | - | - | - |
| (Neame et al. 2013) | Invertebrates | Ground nesters | Multi | Canada | ↓ Population abundance | Negative | NO | 1 | 0 | 1 |
| (Neame et al. 2013) | Invertebrates | Cavity nesters | Multi | Canada | ↓ Population abundance | Neutral | NO | - | - | - |
| (Neame et al. 2013) | Invertebrates | Brood parasites | Multi | Canada | ↓ Population abundance | Positive | NO | - | - | - |
| (Neame et al. 2013) | Invertebrates | Flower flies | Multi | Canada | ↓ Population abundance | Neutral | NO | - | - | - |
| (Neame et al. 2013) | Invertebrates | Ground nesters | Multi | Canada | ↓ Diversity | Neutral | NO | - | - | - |
| (Neame et al. 2013) | Invertebrates | Cavity nesters | Multi | Canada | ↓ Diversity | Neutral | NO | - | - | - |
| (Neame et al. 2013) | Invertebrates | Brood parasites | Multi | Canada | ↓ Diversity | Positive | NO | - | - | - |
| (Neame et al. 2013) | Invertebrates | Flower flies | Multi | Canada | ↓ Diversity | Neutral | NO | - | - | - |
| (Neumann et al. 2013) | Mammal | Moose | Single | Sweden | ↓ Individual space use | Negative | NO | 1 | 0 | 0 |
| (Norris et al. 2013) | Birds | Gray jays | Single | Canada | ↓ Population growth / mean body size | Negative | NO | 0 | 1 | 0 |
| (Northrup et al. 2012) | Mammal | Grizzly bear | Single | Canada | ↓ Individual space use | Negative | YES | 1 | 0 | 0 |
| (Northrup et al. 2015) | Mammal | mule deer | Single | USA | ↓ Individual space use | Negative | NO | 1 | 0 | 0 |
| (Nyhof and Trulio 2015) | Reptile | Western pond turtles | Single | USA | ↑ stress indicators | Negative | YES | 1 | 0 | 0 |
| (Oden et al. 2015) | Birds | Black-capped Chickadees | Single | USA | ↑ stress indicators | Negative | YES | 1 | 0 | 0 |
| (Oden et al. 2015) | Birds | American Goldfinches | Single | USA | ↑ stress indicators | Negative | YES | 1 | 0 | 0 |
| (Orci et al. 2016) | Invertebrates | Tree cricket | Single | Hungary | ↑ stress indicators | Negative | YES | 1 | 0 | 0 |
| (Ordiz et al. 2015) | Mammal | Scandinavian wolf | Single | Norway and Sweden | ↓ Population abundance | Negative | NO | 1 | 0 | 0 |
| (Owens et al. 2012) | Birds | Carolina chickadee and titimice | Multi | USA | ↑ stress indicators | Negative | YES | 1 | 0 | 0 |
| (Owens et al. 2012) | Birds | Carolina chickadee and titimice | Multi | USA | ↑ stress indicators | Neutral | YES | - | - | - |
| (Parks et al. 2015) | Mammal | mountain goat | Single | Canada and USA | ↑ Genetic difference | Negative | NO | 0 | 0 | 1 |
| (Patthey et al. 2012) | Birds | Black grouse | Single | Switzerland | ↓ Individual space use | Negative | NO | 1 | 0 | 0 |
| (Peaden et al. 2015) | Reptile | Mojave desert tortoises | Single | USA | ↓ Population abundance | Negative | YES | 1 | 1 | 0 |
| (Petranka and Francis 2013) | Amphibia | Spotted salamanders | Single | USA | ↓ Reproduction, growth and survival | Neutral | YES | - | - | - |
| (Petranka and Francis 2013) | Amphibia | Spotted salamanders | Single | USA | ↓ Reproduction, growth and survival | Negative | YES | 1 | 0 | 0 |
| (Petranka and Francis 2013) | Amphibia | Spotted salamanders | Single | USA | ↓ Reproduction, growth and survival | Neutral | YES | - | - | - |
| (Petranka and Francis 2013) | Amphibia | Spotted salamanders | Single | USA | ↓ Reproduction, growth and survival | Neutral | YES | - | - | - |
| (Pettinga et al. 2016) | BIrds | Songbirds | Multi | USA | ↑ stress indicators | Neutral | YES | - | - | - |
| (Pigeon et al. 2014) | Mammal | Grizzly bear | Single | Canada | ↓ Individual space use | Negative | NO | 1 | 0 | 0 |
| (Pinard et al. 2012) | Mammal | Forest-dwelling caribou | Single | Canada | ↓ Individual space use | Negative | NO | 1 | 0 | 1 |
| (Pisa et al. 2015) | Amphibia | fire salamander | Single | Italy | ↑ Genetic difference | Negative | NO | 0 | 0 | 1 |
| (Planillo and Malo 2013) | Mammal | European rabbit | Single | Spain | ↓ Population abundance | Negative | YES | 1 | 1 | 0 |
| (Planillo and Malo 2013) | Mammal | Carnivores (predators) | Multi | Spain | ↓ Population abundance | Negative | YES | 0 | 0 | 0 |
| (Planillo et al. 2015) | Birds | Red kite | Single | Spain | ↓ Population abundance | Positive | YES | - | - | - |
| (Planillo et al. 2015) | Birds | Raptors | Single | Spain | ↓ Population abundance | Neutral | YES | - | - | - |
| (Planillo et al. 2015) | Birds | Griffon vultures | Single | Spain | ↓ Population abundance | Negative | YES | 1 | 1 | 0 |
| (Planillo et al. 2015) | Birds | Raptors | Multi | Spain | ↓ Diversity | Positive | YES | - | - | - |
| (Planillo et al. 2015) | Birds | Raptors | Multi | Spain | ↓ Diversity | Negative | YES | 1 | 1 | 0 |
| (Planillo et al. 2015) | Birds | Raptors | Multi | Spain | ↓ Population abundance | Positive | YES | - | - | - |
| (Planillo et al. 2015) | Birds | Raptors | Multi | Spain | ↓ Population abundance | Negative | YES | 1 | 1 | 0 |
| (Poel et al. 2015) | Mammal | Hedgehogs | Single | Holland | ↓ Population abundance | Positive | NO | - | - | - |
| (Poessel et al. 2014) | Mammal | Bobcat | Single | USA | ↓ Individual space use | Neutral | YES | - | - | - |
| (Poessel et al. 2014) | Mammal | Bobcat | Single | USA | ↓ Population abundance | Negative | YES | 0 | 1 | 1 |
| (Potvin and MacDougall-Shackleton 2015a) | Birds | Zebra finches | Single | Canada | ↑ stress indicators | Negative | YES | 1 | 0 | 0 |
| (Potvin and MacDougall-Shackleton 2015a) | Birds | Zebra finches | Single | Canada | ↑ stress indicators | Neutral | YES | - | - | - |
| (Potvin and MacDougall-Shackleton 2015b) | Birds | Zebra finches | Single | Canada | ↓ Reproduction, growth and survival | Negative | YES | 1 | 0 | 0 |
| (Proctor et al. 2012) | Mammal | grizzly bear | Single | Canada | ↑ Genetic difference | Negative | NO | 1 | 1 | 1 |
| (Proctor et al. 2015) | Mammal | grizzly bear | Single | Canada and USA | ↓ Individual space use | neutral | YES | - | - | - |
| (Proppe et al. 2013a) | Birds | Black-capped Chickadees | Single | Canada | ↑ stress indicators | Neutral | YES | - | - | - |
| (Proppe et al. 2013a) | Birds | Black-capped Chickadees | Single | Canada | ↓ Reproduction, growth and survival | Neutral | YES | - | - | - |
| (Proppe et al. 2013b) | Birds | Birds | Multi | Canada | ↓ Diversity | Negative | NO | 1 | 0 | 0 |
| (Proppe et al. 2013b) | Birds | Western tanager | Single | Canada | ↓ Population abundance | Negative | NO | 1 | 0 | 0 |
| (Proppe et al. 2013b) | Birds | Least flycatcher | Single | Canada | ↓ Population abundance | Negative | NO | 1 | 0 | 0 |
| (Proppe et al. 2013b) | Birds | Red-breasted nuthatch | Single | Canada | ↓ Population abundance | Negative | NO | 1 | 0 | 0 |
| (Proppe et al. 2013b) | Birds | Black-capped chickadee | Single | Canada | ↓ Population abundance | Neutral | NO | - | - | - |
| (Proppe et al. 2013b) | Birds | Red-eyed vireo | Single | Canada | ↓ Population abundance | Neutral | NO | - | - | - |
| (Proppe et al. 2013b) | Birds | White-throated sparrow | Single | Canada | ↓ Population abundance | Neutral | NO | - | - | - |
| (Proppe et al. 2013b) | Birds | Yellow warbler | Single | Canada | ↓ Population abundance | Neutral | NO | - | - | - |
| (Proulx et al. 2014) | Reptile | Blanding's turtle | Single | Canada | ↓ Individual space use | Negative | YES | 0 | 1 | 1 |
| (Prunier et al. 2014) | Amphibia | Alpine newt | Single | France | ↑ Genetic difference | Neutral | YES | - | - | - |
| (Pusparini et al. 2015) | Mammal | Sumatran Rhinoceros | Single | Sumatra | ↓ Population abundance | Negative | NO | 1 | 0 | 0 |
| (Qi et al. 2015) | Mammal | Giant panda | Single | China | ↓ Population abundance | Negative | NO | 1 | 0 | 1 |
| (Quesnelle et al. 2013) | Birds | Red-winged blackbird | Single | Canada | ↓ Population abundance | Neutral | NO | - | - | - |
| (Quesnelle et al. 2013) | Birds | Swamp sparrow | Single | Canada | ↓ Population abundance | Neutral | NO | - | - | - |
| (Quesnelle et al. 2013) | Birds | Marsh wren | Single | Canada | ↓ Population abundance | Neutral | NO | - | - | - |
| (Quesnelle et al. 2013) | Birds | American coot | Single | Canada | ↓ Population abundance | Neutral | NO | - | - | - |
| (Quesnelle et al. 2013) | Birds | Common Moorhen | Single | Canada | ↓ Population abundance | Neutral | NO | - | - | - |
| (Quesnelle et al. 2013) | Birds | Sora | Single | Canada | ↓ Population abundance | Neutral | NO | - | - | - |
| (Quesnelle et al. 2013) | Birds | Virginia rail | Single | Canada | ↓ Population abundance | Neutral | NO | - | - | - |
| (Quesnelle et al. 2013) | Birds | Least bittern | Single | Canada | ↓ Population abundance | Neutral | NO | - | - | - |
| (Quesnelle et al. 2013) | Reptile | Blanding’s turtle | Single | Canada | ↓ Population abundance | Neutral | NO | - | - | - |
| (Quesnelle et al. 2013) | Reptile | Eastern musk turtle | Single | Canada | ↓ Population abundance | Neutral | NO | - | - | - |
| (Quiroga et al. 2016) | Mammal | Puma | Single | Argentina | ↓ Population abundance | Neutral | NO | - | - | - |
| (Raab et al. 2015) | Birds | Great Bustard | Single | Austria and Hungary | ↓ Population abundance | Negative | NO | 1 | 0 | 0 |
| (Raab et al. 2015) | Birds | Great Bustard | Single | Austria and Hungary | ↓ Population abundance | Positive | NO | - | - | - |
| (Ramos-robles and Gallina 2013) | Mammal | White-tailed deer | Single | Mexico | ↓ Population abundance | Negative | NO | 1 | 0 | 1 |
| (Raquel et al. 2015) | Birds | birds (waterfowl) | multi | USA | ↓ Reproduction, growth and survival | neutral | NO | - | - | - |
| (Rivas et al. 2015) | Birds | Lesser rheas | Single | Argentina | ↓ Population abundance | Positive | NO | - | - | - |
| (Rivas et al. 2015) | Mammal | Mara | Single | Argentina | ↓ Population abundance | Negative | NO | 1 | 0 | 0 |
| (Rivas et al. 2015) | Mammal | Guanaco | Single | Argentina | ↓ Population abundance | Negative | NO | 1 | 0 | 0 |
| (Robinson et al. 2012) | Mammal | White-tailed-deer | Single | USA | ↑ Genetic difference | Negative | NO | 0 | 0 | 1 |
| (Robson and Blouin-Demers 2013) | Reptile | Eastern Hognose Snake | Single | Canada | ↓ Individual space use | Negative | YES | 0 | 1 | 1 |
| (Rooney et al. 2012) | Birds | Wetland birds | Multi | Canada | ↓ Diversity | Negative | NO | 0 | 0 | 0 |
| (Rota et al. 2015) | Invertebrates | soil arthropods | Multi | Italy | ↓ Population abundance | Positive | NO | - | - | - |
| (Rota et al. 2015) | Invertebrates | soil arthropods | Multi | Italy | ↓ Diversity | Negative | NO | 1 | 0 | 0 |
| (Rota et al. 2015) | Invertebrates | soil arthropods | Multi | Italy | ↓ Population abundance | Neutral | NO | - | - | - |
| (Rotholz and Mandelik 2013) | Invertebrates | Beetles | Multi | Israel | ↓ Diversity | Positive | YES | - | - | - |
| (Rotholz and Mandelik 2013) | Invertebrates | Spiders | Multi | Israel | ↓ Diversity | Positive | YES | - | - | - |
| (Rotholz and Mandelik 2013) | Invertebrates | Scorpions | Multi | Israel | ↓ Diversity | Neutral | YES | - | - | - |
| (Rotholz and Mandelik 2013) | Invertebrates | Diplopods | Multi | Israel | ↓ Diversity | Neutral | YES | - | - | - |
| (Rotholz and Mandelik 2013) | Mammal | Small mammals | Multi | Israel | ↓ Diversity | Neutral | YES | - | - | - |
| (Rotholz and Mandelik 2013) | Invertebrates | Beetles | Multi | Israel | ↓ Population abundance | Neutral | YES | - | - | - |
| (Rotholz and Mandelik 2013) | Invertebrates | Spiders | Multi | Israel | ↓ Population abundance | Positive | YES | - | - | - |
| (Rotholz and Mandelik 2013) | Invertebrates | Scorpions | Multi | Israel | ↓ Population abundance | Positive | YES | - | - | - |
| (Rotholz and Mandelik 2013) | Invertebrates | Diplopods | Multi | Israel | ↓ Population abundance | Negative | YES | 1 | 0 | 0 |
| (Rotholz and Mandelik 2013) | Mammal | Small mammals | Multi | Israel | ↓ Population abundance | Positive | YES | - | - | - |
| (Ruiz-Capillas et al. 2013a) | Mammal | Greater white-toothed shrew | Single | Spain | ↓ Population abundance | Positive | YES | - | - | - |
| (Ruiz-Capillas et al. 2013a) | Mammal | Algerian mouse | Single | Spain | ↓ Population abundance | Positive | YES | - | - | - |
| (Ruiz-Capillas et al. 2013a) | Mammal | Wood mouse | Single | Spain | ↓ Population abundance | Positive | YES | - | - | - |
| (Ruiz-Capillas et al. 2013b) | Mammal | Small mammals | Multi | Spain | ↓ Population abundance | Positive | YES | - | - | - |
| (Ruiz-Capillas et al. 2013b) | Mammal | Lagomorphs | Multi | Spain | ↓ Population abundance | Negative | YES | 1 | 0 | 0 |
| (Ruiz-Capillas et al. 2013b) | Mammal | Red fox | Single | Spain | ↓ Population abundance | Positive | YES | - | - | - |
| (Ruiz-Capillas et al. 2013b) | Mammal | Mustelids | Multi | Spain | ↓ Population abundance | Negative | YES | 1 | 0 | 0 |
| (Ruiz-capillas et al. 2015) | Mammal | Small mammals | Multi | Spain | ↑ Roadkill | Negative | NO | 0 | 1 | 0 |
| (Sánchez-García et al. 2012) | Mammal | Iberian hare | Single | Spain | Per capita roadkill | Negative | NO | 0 | 1 | 0 |
| (Scobie et al. 2014) | Birds | Burrowing owl | Single | Canada | ↓ Individual space use | Negative | YES | 1 | 0 | 0 |
| (Sexson and Farley 2012) | Birds | Snowy plover | Single | USA | ↓ Reproduction, growth and survival | Negative | NO | 1 | 0 | 0 |
| (Sfougaris et al. 2014) | Birds | Shrike (Lanius minor) | Single | Greece | ↓ Population abundance | Negative | NO | 0 | 0 | 0 |
| (Sfougaris et al. 2014) | Birds | Shrike (Lanius senator) | Single | Greece | ↓ Population abundance | Positive | NO | - | - | - |
| (Sfougaris et al. 2014) | Birds | Shrike (Lanius collurio) | Single | Greece | ↓ Population abundance | Neutral | NO | - | - | - |
| (Shannon et al. 2014) | Mammal | Prairie dog | Single | USA | ↓ Population abundance | Negative | YES | 1 | 0 | 0 |
| (Shannon et al. 2014) | Mammal | Prairie dog | Single | USA | ↑ stress indicators | Negative | YES | 1 | 0 | 0 |
| (Shannon et al. 2014) | Mammal | Prairie dog | Single | USA | ↑ stress indicators | Negative | YES | 1 | 0 | 0 |
| (Shannon et al. 2016) | Mammal | Wild black-tailed prairie dogs | Single | USA | ↑ stress indicators | Negative | YES | 1 | 0 | 0 |
| (Shao et al. 2015) | Birds | Chinese merganser | Single | China | ↓ Population abundance | Positive | NO | - | - | - |
| (Shao et al. 2015) | Birds | Chinese merganser | Single | China | ↓ Population abundance | Positive | NO | - | - | - |
| (Shier et al. 2012) | Mammal | Stephen’s kangaroo rat | Single | USA | ↑ stress indicators | Negative | YES | 1 | 0 | 0 |
| (Simek et al. 2015) | Mammal | American black bear | Single | USA | ↓ Population abundance | Negative | YES | 1 | 1 | 1 |
| (Singh et al. 2012) | Mammal | Moose | Single | Sweden and Norway | ↓ Individual space use | Negative | NO | 1 | 1 | 1 |
| (Singh et al. 2012) | Mammal | Moose | Single | Sweden and Norway | ↓ Population abundance | Negative | NO | 1 | 1 | 1 |
| (Skarin et al. 2015) | Mammal | reindeer | Single | Sweden | ↓ Population abundance | Negative | NO | 1 | 0 | 1 |
| (Skarin et al. 2015) | Mammal | reindeer | Single | Sweden | ↓ Individual space use | Negative | NO | 1 | 0 | 1 |
| (Skórka et al. 2013) | Invertebrates | Butterflies | Multi | Poland | ↑ Roadkill | Negative | YES | 0 | 1 | 0 |
| (Skórka et al. 2015) | Invertebrates | Butterflies | Multi | Poland | ↑ Roadkill | Negative | YES | 0 | 1 | 0 |
| (Sliwinski and Koper 2012) | Birds | Baird's Sparrow | Single | Canada | ↓ Population abundance | Negative | NO | 1 | 0 | 1 |
| (Sliwinski and Koper 2012) | Birds | Brown-headed Cowbird | Single | Canada | ↓ Population abundance | Positive | NO | - | - | - |
| (Sliwinski and Koper 2012) | Birds | Chestnut-collared Longspur | Single | Canada | ↓ Population abundance | Neutral | NO | - | - | - |
| (Sliwinski and Koper 2012) | Birds | Clay-colored Sparrow | Single | Canada | ↓ Population abundance | Neutral | NO | - | - | - |
| (Sliwinski and Koper 2012) | Birds | Horned Lark | Single | Canada | ↓ Population abundance | Neutral | NO | - | - | - |
| (Sliwinski and Koper 2012) | Birds | Long-billed Curlew | Single | Canada | ↓ Population abundance | Neutral | NO | - | - | - |
| (Sliwinski and Koper 2012) | Birds | Marbled Godwit | Single | Canada | ↓ Population abundance | Negative | NO | 1 | 0 | 1 |
| (Sliwinski and Koper 2012) | Birds | Savannah Sparrow | Single | Canada | ↓ Population abundance | Neutral | NO | - | - | - |
| (Sliwinski and Koper 2012) | Birds | Sprague’s Pipit | Single | Canada | ↓ Population abundance | Neutral | NO | - | - | - |
| (Sliwinski and Koper 2012) | Birds | Vesper Sparrow | Single | Canada | ↓ Population abundance | Positive | NO | - | - | - |
| (Sliwinski and Koper 2012) | Birds | Western Meadowlark | Single | Canada | ↓ Population abundance | Neutral | NO | - | - | - |
| (Sliwinski and Koper 2012) | Birds | Willet | Single | Canada | ↓ Population abundance | Neutral | NO | - | - | - |
| (Snow and Andelt 2013) | Mammal | San Clement Island fox | Single | USA | ↓ Population abundance | Positive | YES | - | - | - |
| (Snow et al. 2012) | Mammal | San Clement Island fox | Single | USA | Per capita roadkill | Negative | YES | 0 | 1 | 0 |
| (Snow et al. 2012) | Mammal | San Clement Island fox | Single | USA | ↓ Population growth / mean body size | Negative | YES | 0 | 1 | 0 |
| (Snow et al. 2012) | Mammal | San Clement Island fox | Single | USA | ↓ Individual space use | Neutral | YES | - | - | - |
| (Soh et al. 2014) | Mammal | Ungulates | Multi | China | ↓ Population abundance | Negative | NO | 0 | 0 | 0 |
| (Sorensen et al. 2015) | Mammal | grizzly bear | single | Canada | ↓ Individual space use | Neutral | NO | - | - | - |
| (Stephens et al. 2013) | Mammal | Swamp rat | Single | Australia | ↑ Genetic difference | Negative | YES | 0 | 0 | 1 |
| (Stewart et al. 2013) | Mammal | Grizzly bear | Single | Canada | ↓ Population abundance | Positive | YES | - | - | - |
| (Steyaert et al. 2015) | Mammal | Eurasian beaver | Single | Norway | ↓ Population abundance | Positive | NO | - | - | - |
| (Steyaert et al. 2015) | Mammal | Eurasian beaver | Single | Norway | ↓ Individual space use | Negative | NO | 1 | 0 | 0 |
| (Stillfried et al. 2015) | Mammal | Black bears | Single | USA | ↓ Individual space use | Negative | NO | 1 | 1 | 0 |
| (Stonehouse et al. 2015) | Birds | greater sage-grouse | Single | USA | ↓ Individual space use | Negative | NO | 1 | 1 | 0 |
| (Stonehouse et al. 2015) | Birds | Columbian sharp-tailed grouse | Single | USA | ↓ Individual space use | Negative | NO | 1 | 1 | 0 |
| (Strasser and Heath 2013) | Birds | American kestrel | Single | USA | ↓ Reproduction, growth and survival | Negative | YES | 1 | 1 | 0 |
| (Strasser and Heath 2013) | Birds | American kestrel | Single | USA | ↑ stress indicators | Negative | YES | 1 | 0 | 0 |
| (Suárez et al. 2013) | Vertebrates | Birds+Mammals | Multi | Ecuador | ↓ Diversity | Negative | YES | 1 | 0 | 1 |
| (Suárez et al. 2013) | Vertebrates | Birds+Mammals | Multi | Ecuador | ↓ Population abundance | Negative | YES | 1 | 0 | 1 |
| (Syrbe et al. 2013) | Birds | Wetland/water bird species | Multi | Germany | ↓ Diversity | Negative | NO | 0 | 0 | 0 |
| (Syrbe et al. 2013) | Birds | Open-country bird species | Multi | Germany | ↓ Diversity | Negative | NO | 0 | 0 | 1 |
| (Syrbe et al. 2013) | Birds | Forest bird species | Multi | Germany | ↓ Diversity | Negative | NO | 0 | 0 | 0 |
| (Takahata et al. 2013) | Mammal | Asiatic black bear | Single | Japan | ↓ Individual space use | Positive | NO | - | - | - |
| (Tanadini et al. 2012) | Amphibia | Salamander | Single | Switzerland | ↓ Population abundance | Positive | NO | - | - | - |
| (Tanner et al. 2016) | Birds | Northen bobwhite | Single | USA | ↓ Reproduction, growth and survival | Negative | NO | 1 | 1 | 0 |
| (Taraborelli et al. 2014) | Mammal | Guanaco | Single | Argentina | ↓ Population abundance | Negative | NO | 1 | 0 | 0 |
| (Taraborelli et al. 2014) | Mammal | Guanaco | Single | Argentina | ↑ stress indicators | Negative | NO | 1 | 0 | 0 |
| (Tattoni et al. 2015) | Mammal | Eurasian brown bear | Single | Italy | ↓ Population abundance | Neutral | NO | - | - | - |
| (Taylor et al. 2016) | Mammal | Pronghorn | Single | USA | ↓ Reproduction, growth and survival | Negative | NO | 1 | 1 | 0 |
| (Tennessen et al. 2014) | Amphibia | Wood frog | Single | USA | ↑ stress indicators | Negative | YES | 1 | 0 | 0 |
| (Tennessen et al. 2014) | Amphibia | Wood frog | Single | USA | ↑ stress indicators | Negative | YES | 1 | 0 | 0 |
| (Thompson et al. 2015) | Birds | Birds | Multi | USA | ↓ Population abundance | Negative | NO | 1 | 0 | 0 |
| (Thompson et al. 2015) | Birds | Bobolink | Single | USA | ↓ Population abundance | Negative | NO | 1 | 0 | 0 |
| (Thompson et al. 2015) | Birds | Savannah sparrow | Single | USA | ↓ Population abundance | Negative | NO | 1 | 0 | 0 |
| (Thompson et al. 2015) | Birds | Brown-headed cowbird | Single | USA | ↓ Population abundance | Neutral | NO | - | - | - |
| (Thurfjell et al. 2015) | Mammal | Wild boar | Single | Sweden | ↓ Roadkill | Negative | YES | 1 | 1 | 0 |
| (Timmer et al. 2014) | Birds | Lesser prairie-chickens | Single | USA | ↓ Population abundance | Negative | NO | 1 | 0 | 1 |
| (Trochet et al. 2016) | Amphibia | Palmate newts | SIngle | France | ↓ Population growth / mean body size | Negative | NO | 0 | 1 | 0 |
| (Troïanowski et al. 2015) | Amphibia | European treefrog | Single | France | ↑ stress indicators | Negative | YES | 1 | 0 | 0 |
| (Uboni et al. 2015) | Mammal | Wolf | single | USA | ↓ Individual space use | Neutral | NO | - | - | - |
| (Valero et al. 2015) | Mammal | roe deer and wild boar | Multi | Spain | ↑ Roadkill | Negative | YES | 0 | 1 | 1 |
| (Vanthomme et al. 2013) | Mammal | Forest elephant | Single | Gabon | ↓ Population abundance | Negative | YES | 1 | 0 | 0 |
| (Vanthomme et al. 2013) | Mammal | Buffalo | Single | Gabon | ↓ Population abundance | Negative | YES | 1 | 0 | 0 |
| (Vanthomme et al. 2013) | Mammal | Sitatunga | Single | Gabon | ↓ Population abundance | Negative | YES | 1 | 0 | 0 |
| (Vanthomme et al. 2013) | Mammal | Yellow-backed duiker | Single | Gabon | ↓ Population abundance | Neutral | YES | - | - | - |
| (Vanthomme et al. 2013) | Mammal | Blue Duiker | Single | Gabon | ↓ Population abundance | Neutral | YES | - | - | - |
| (Vanthomme et al. 2013) | Mammal | Red duikers | Single | Gabon | ↓ Population abundance | Positive | YES | - | - | - |
| (Vanthomme et al. 2013) | Mammal | Red river hog | Single | Gabon | ↓ Population abundance | Positive | YES | - | - | - |
| (Vanthomme et al. 2013) | Mammal | Water chevrotain | Single | Gabon | ↓ Population abundance | Neutral | YES | - | - | - |
| (Vanthomme et al. 2013) | Mammal | Side-striped jackal | Single | Gabon | ↓ Population abundance | Neutral | YES | - | - | - |
| (Vanthomme et al. 2013) | Mammal | Small terrestrial carnivores | Multi | Gabon | ↓ Population abundance | Negative | YES | 1 | 0 | 0 |
| (Vanthomme et al. 2013) | Mammal | Small terrestrial carnivores | Single | Gabon | ↓ Population abundance | Positive | YES | - | - | - |
| (Vanthomme et al. 2013) | Mammal | Western lowland gorilla | Single | Gabon | ↓ Population abundance | Negative | YES | 1 | 0 | 0 |
| (Vanthomme et al. 2013) | Mammal | Central African chimpanzee | Single | Gabon | ↓ Population abundance | Positive | YES | - | - | - |
| (Vanthomme et al. 2013) | Mammal | Central African chimpanzee | Single | Gabon | ↓ Population abundance | Negative | YES | 1 | 0 | 0 |
| (Vanthomme et al. 2013) | Mammal | Collared mangabey | Single | Gabon | ↓ Population abundance | Positive | YES | - | - | - |
| (Vanthomme et al. 2013) | Mammal | Collared mangabey | Single | Gabon | ↓ Population abundance | Negative | YES | 1 | 0 | 0 |
| (Vanthomme et al. 2013) | Mammal | Spot-nosed monkey | Single | Gabon | ↓ Population abundance | Positive | YES | - | - | - |
| (Vanthomme et al. 2013) | Mammal | Common monkeys | Single | Gabon | ↓ Population abundance | Neutral | YES | - | - | - |
| (Vanthomme et al. 2013) | Mammal | Brushed-tailed porcupine | Single | Gabon | ↓ Population abundance | Neutral | YES | - | - | - |
| (Vanthomme et al. 2013) | Mammal | Giant-pouched rat | Single | Gabon | ↓ Population abundance | Neutral | YES | - | - | - |
| (Vargas-Salinas and Amézquita 2013) | Amphibia | Poison frog | Single | Colombia | ↑ stress indicators | Negative | YES | 1 | 0 | 0 |
| (Vargas-Salinas and Amézquita 2013) | Amphibia | Poison frog | Single | Colombia | ↓ Population abundance | Neutral | YES | - | - | - |
| (Vargas-salinas and Cunnington 2014) | Amphibia | American toad | Single | Canada | ↑ stress indicators | Neutral | YES | - | - | - |
| (Vargas-salinas and Cunnington 2014) | Amphibia | Gray treefrog | Single | Canada | ↑ stress indicators | Neutral | YES | - | - | - |
| (Vargas-salinas and Cunnington 2014) | Amphibia | Green frog | Single | Canada | ↑ stress indicators | Negative | YES | 1 | 0 | 0 |
| (Vargas-salinas and Cunnington 2014) | Amphibia | Bullfrog | Single | Canada | ↑ stress indicators | Negative | YES | 1 | 0 | 0 |
| (Végvári et al. 2016) | Birds | Great bustard | Single | Hungary | ↓ Population abundance | Neutral | NO | - | - | - |
| (Vieira-neto et al. 2016) | Invertebrates | Leaf-cutter ant | Single | Brazil | ↓ Population abundance | Positive | YES | - | - | - |
| (Vieira-neto et al. 2016) | Invertebrates | Leaf-cutter ant | Single | Brazil | ↓ Population growth / mean body size | Positive | YES | - | - | - |
| (Vu et al. 2015) | Invertebrates | Butterflies | Multi | Vietnam | ↓ Diversity | Positive | NO | - | - | - |
| (Walker and Marzluff 2015) | Birds | Common raven | Single | USA | ↓ Population abundance | Positive | NO | - | - | - |
| (Wang et al. 2015) | Birds | Great bustard | Single | China | ↑ stress indicators | Negative | NO | 1 | 0 | 0 |
| (Ware et al. 2015) | Birds | migratory songbirds | Multi | USA | ↓ Population abundance | Negative | YES | 1 | 0 | 0 |
| (Ware et al. 2015) | Birds | migratory songbirds | Multi | USA | ↓ Population growth / mean body size | Negative | YES | 1 | 0 | 0 |
| (Ware et al. 2015) | Birds | white-crowned sparrow | Single | USA | ↑ stress indicators | Negative | YES | 1 | 0 | 0 |
| (Webb et al. 2013) | Mammal | Mule deer | Single | USA | ↓ Individual space use | Negative | NO | 1 | 0 | 0 |
| (Whitworth et al. 2015) | Amphibia | Amphibians | Multi | Ecuador | ↓ Population abundance | Neutral | YES | - | - | - |
| (Whitworth et al. 2015) | Amphibia | Amphibians | Multi | Ecuador | ↓ Diversity | Negative | YES | 1 | 1 | 1 |
| (Whitworth et al. 2015) | Birds | Understorey birds | Multi | Ecuador | ↓ Population abundance | Negative | YES | 1 | 1 | 1 |
| (Whitworth et al. 2015) | Birds | Understorey birds | Multi | Ecuador | ↓ Diversity | Negative | YES | 1 | 1 | 1 |
| (Whitworth et al. 2015) | Birds | Diurnal birds | Multi | Ecuador | ↓ Population abundance | Positive | YES | - | - | - |
| (Whitworth et al. 2015) | Birds | Diurnal birds | Multi | Ecuador | ↓ Diversity | Positive | YES | - | - | - |
| (Whitworth et al. 2015) | Invertebrates | Butterflies | Multi | Ecuador | ↓ Population abundance | Neutral | YES | - | - | - |
| (Whitworth et al. 2015) | Invertebrates | Butterflies | Multi | Ecuador | ↓ Diversity | Positive | YES | - | - | - |
| (Wiącek et al. 2015) | Birds | Birds | Multi | Poland | ↓ Population abundance | Negative | YES | 1 | 1 | 0 |
| (Wiącek et al. 2015) | Birds | Birds (5 spp) | Single | Poland | ↓ Population abundance | Negative | YES | 1 | 1 | 0 |
| (Wiącek et al. 2015) | Birds | Birds | Single | Poland | ↓ Population abundance | Positive | YES | - | - | - |
| (Wiącek et al. 2015) | Birds | Birds | Multi | Poland | ↓ Population abundance | Negative | YES | 1 | 1 | 0 |
| (Wiącek et al. 2015) | Birds | Birds | Multi | Poland | ↓ Diversity | Negative | YES | 1 | 1 | 0 |
| (Wiącek et al. 2015) | Birds | Birds | Multi | Poland | ↓ Diversity | Negative | YES | 1 | 1 | 0 |
| (Wiebe et al. 2013) | Mammal | Marten | Single | Canada | ↓ Population abundance | Positive | NO | - | - | - |
| (Wilson et al. 2016) | Mammal | Wood mouse | Single | Scotland | ↑ Genetic difference | Neutral | NO | - | - | - |
| (Winston and Herz 2015) | Invertebrates | leafcutter ant | single | Panama | ↓ Individual space use | Positive | YES | - | - | - |
| (Winston and Herz 2015) | Invertebrates | leafcutter ant | single | Panama | ↓ Individual space use | Neutral | YES | - | - | - |
| (Yahya et al. 2016) | BIrds | Sunda Scops-owl | Single | Malaysia | ↓ Population abundance | Negative | NO | 1 | 0 | 1 |
| (Yahya et al. 2016) | BIrds | Spotted Wood-owl | Single | Malaysia | ↓ Population abundance | Neutral | NO | - | - | - |
| (Yahya et al. 2016) | BIrds | Common Barn-owl | Single | Malaysia | ↓ Population abundance | Negative | NO | 1 | 0 | 1 |
| (Yahya et al. 2016) | BIrds | Large-tailed Nightjar | Single | Malaysia | ↓ Population abundance | Negative | NO | 1 | 0 | 1 |
| (Yang and Slabbekoorn 2014) | Birds | Eurasian wren | Single | Netherlands | ↑ stress indicators | Neutral | YES | - | - | - |
| (Yrjölä and Santaharju 2015) | Birds | farmland birds | Multi | Finland | ↓ Diversity | neutral | YES | - | - | - |
| (Yrjölä and Santaharju 2015) | Birds | farmland birds | Multi | Finland | ↓ Population abundance | Positive | YES | - | - | - |
| (Zhang et al. 2012) | Birds | Black-faced spoonbills | Single | China | ↓ Population abundance | Negative | YES | 1 | 0 | 0 |
| (Zhang et al. 2012) | Birds | Black-faced spoonbills | Single | China | ↑ stress indicators | Neutral | YES | - | - | - |
| (Zimmerman et al. 2015) | Mammal | Southeastern beach mouse | Single | USA | ↑ Genetic difference | Positive | NO | - | - | - |
| (Zimmermann et al. 2014) | Mammal | Wolves | Single | Sweden and Norway | ↓ Individual space use | Positive | YES | - | - | - |
| (Zimmermann et al. 2014) | Mammal | Wolves | Single | Sweden and Norway | ↓ Individual space use | Neutral | YES | - | - | - |
| (Zimmermann et al. 2014) | Mammal | Wolves | Single | Sweden and Norway | ↓ Population abundance | Negative | YES | 1 | 0 | 0 |

**References**

Abrahms B, Jordan NR, Golabek KA, et al (2016) Lessons from integrating behaviour and resource selection: activity-specific responses of African wild dogs to roads. Anim Conserv 19:247–255. doi: 10.1111/acv.12235

Ahmed SE, Lees AC, Moura NG, et al (2014) Road networks predict human influence on Amazonian bird communities. Proc R Soc B Biol Sci 281:20141742–20141742. doi: 10.1098/rspb.2014.1742

Al Sayegh Petkovšek S, Kopušar N, Kryštufek B (2014) Small mammals as biomonitors of metal pollution: a case study in Slovenia. Environ Monit Assess 4261–4274. doi: 10.1007/s10661-014-3696-7

Amelon SK, Service USDAF, Building NR (2014) Resource Utilization by Foraging Eastern Red Bats ( Lasiurus borealis ) in the Ozark Region of Missouri. 78:483–493. doi: 10.1002/jwmg.685

Astudillo PX, Samaniego GM, Machado PJ, et al (2014) The impact of roads on the avifauna of páramo grasslands in Cajas National Park, Ecuador. Stud Neotrop Fauna Environ 49:204–212. doi: 10.1080/01650521.2014.960778

Azhar B, Puan CL, Aziz N, et al (2015) Effects of in situ habitat quality and landscape characteristics in the oil palm agricultural matrix on tropical understory birds, fruit bats and butterflies. Biodivers Conserv 24:3125–3144. doi: 10.1007/s10531-015-1005-6

Azhar B, Puan CL, Zakaria M, et al (2014) Effects of monoculture and polyculture practices in oil palm smallholdings on tropical farmland birds. Basic Appl Ecol 15:336–346. doi: 10.1016/j.baae.2014.06.001

Balkenhol N, Holbrook JD, Onorato D, et al (2014) A multi-method approach for analyzing hierarchical genetic structures : a case study with cougars Puma concolor. 552–563. doi: 10.1111/j.1600-0587.2013.00462.x

Bani L, Pisa G, Luppi M, et al (2015) Ecological connectivity assessment in a strongly structured fire salamander ( Salamandra salamandra ) population. Ecol Evol 5:3472–3485. doi: 10.1002/ece3.1617

Barbar F, Werenkraut V, Morales JM, Lambertucci SA (2015) Emerging Ecosystems Change the Spatial Distribution of Top Carnivores Even in Poorly Populated Areas. PLoS One 10:e0118851. doi: 10.1371/journal.pone.0118851

Bart J, Platte RM, Andres B, et al (2013) Importance of the National Petroleum Reserve-Alaska for Aquatic Birds. Conserv Biol 27:1304–1312. doi: 10.1111/cobi.12133

Barthelmess EL (2014) Spatial distribution of road-kills and factors influencing road mortality for mammals in Northern New York State. 2491–2514. doi: 10.1007/s10531-014-0734-2

Bartzke GS, May R, Solberg EJ, et al (2015) Differential barrier and corridor effects of power lines, roads and rivers on moose ( Alces alces ) movements. Ecosphere 6:art67. doi: 10.1890/ES14-00278.1

Baxter-Gilbert JH, Riley JL, Mastromonaco GF, et al (2014) A novel technique to measure chronic levels of corticosterone in turtles living around a major roadway. Conserv Physiol 2:cou036-cou036. doi: 10.1093/conphys/cou036

Beatty WS, Beasley JC, Olson ZH, Rhodes OE (2016) Influence of habitat attributes on density of Virginia opossums ( Didelphis virginiana ) in agricultural ecosystems. 419:411–419

Beckmann JP, Waits LP, Hurt A, et al (2015) Using Detection Dogs and Rspf Models to Assess Habitat Suitability for Bears in Greater Yellowstone. West North Am Nat 75:396–405. doi: 10.3398/064.075.0410

Bellis LM, Pidgeon AM, Alcántara C, et al (2015) Influences of succession and erosion on bird communities in a South American highland wooded landscape. For Ecol Manage 349:85–93. doi: 10.1016/j.foreco.2015.03.047

Beninde J, Feldmeier S, Werner M, Peroverde D (2016) Cityscape genetics : structural vs . functional connectivity of an urban lizard population. 4984–5000. doi: 10.1111/mec.13810

Bennett VJ, Zurcher A a., Haute T (2013) When corridors collide: Road-related disturbance in commuting bats. J Wildl Manage 77:93–101. doi: 10.1002/jwmg.467

Berry KH, Coble AA, Yee JL, et al (2015) Distance to human populations influences epidemiology of respiratory disease in desert tortoises. J Wildl Manage 79:122–136. doi: 10.1002/jwmg.816

Berry KH, Yee JL, Coble AA, et al (2013) Multiple Factors Affect a Population of Agassiz’s Desert Tortoise ( Gopherus agassizii ) in the Northwestern Mojave Desert. Herpetol Monogr 27:87–109. doi: 10.1655/HERPMONOGRAPHS-D-13-00002

Berthinussen A, Altringham J (2012) The effect of a major road on bat activity and diversity. J Appl Ecol 49:82–89. doi: 10.1111/j.1365-2664.2011.02068.x

Beyer HL, Gurarie E, Bo L, et al (2016) ‘ You shall not pass !’: quantifying barrier permeability and proximity avoidance by animals. 43–53. doi: 10.1111/1365-2656.12275

Beyer HL, Ung R, Murray DL (2013) Functional responses , seasonal variation and thresholds in behavioural responses of moose to road density. 286–294. doi: 10.1111/1365-2664.12042

Bled F, Summers S, Martell D, et al (2015) Effects of Prey Presence and Scale on Bobcat Resource Selection during Winter. PLoS One 10:e0143347. doi: 10.1371/journal.pone.0143347

Blickley JL, Blackwood D, Patricelli GL (2012) Experimental Evidence for the Effects of Chronic Anthropogenic Noise on Abundance of Greater Sage-Grouse at Leks. Conserv Biol 26:461–471. doi: 10.1111/j.1523-1739.2012.01840.x

Bonsen G, Law B, Ramp D (2015) Foraging Strategies Determine the Effect of Traffic Noise on Bats. Acta Chiropterologica 17:347–357. doi: 10.3161/15081109ACC2015.17.2.010

Bortolamiol S, Chimpanzee S, Scp P, et al (2016) Chimpanzee Non-Avoidance of Hyper-Proximity to Humans. 80:924–934. doi: 10.1002/jwmg.1072

Boulanger J, Cattet M, Nielsen SE, et al (2013) Use of multi-state models to explore relationships between changes in body condition, habitat and survival of grizzly bears Ursus arctos horribilis. Wildlife Biol 19:274–288. doi: 10.2981/12-088

Braga CA de C, Prevedello JA, Pires MRS (2015) Effects of cornfields on small mammal communities: a test in the Atlantic Forest hotspot. J Mammal 96:938–945. doi: 10.1093/jmammal/gyv094

Brehme CS, Tracey J a., Clenaghan LRMC, et al (2013) Permeability of roads to movement of scrubland lizards and small mammals. Conserv Biol 27:710–720. doi: 10.1111/cobi.12081

Bright PW, Holloway R (2015) THE EFFECT OF CHANGES IN TRAFFIC FLOW ON MAMMAL ROAD KILL COUNTS. Appl Ecol Environ Res 13:. doi: 10.15666/aeer/1301_171179

Brodie JF, Giordano AJ, Dickson B, et al (2015) Evaluating multispecies landscape connectivity in a threatened tropical mammal community. Conserv Biol 29:122–132. doi: 10.1111/cobi.12337

Broman DJA, Litvaitis JA, Ellingwood M, et al (2014) Modeling Bobcat Lynx rufus Habitat Associations Using Telemetry Locations and Citizen-Scientist Observations: Are the Results Comparable? Wildlife Biol 20:229–237. doi: 10.2981/wlb.00022

Brown MG, Dobbs EK, Snodgrass JW, Ownby DR (2012) Ameliorative effects of sodium chloride on acute copper toxicity among Cope’s gray tree frog (Hyla chrysoscelis) and green frog (Rana clamitans) embryos. Environ Toxicol Chem 31:836–842. doi: 10.1002/etc.1751

Brzeziński M, Eliava G, Zmihorski M, et al (2012) Road mortality of pond-breeding amphibians during spring migrations in the Mazurian Lakeland, NE Poland. Eur J Wildl Res 58:685–693. doi: 10.1007/s10344-012-0618-2

Buchanan CB, Beck JL, Bills TE, Miller SN (2014) Seasonal Resource Selection and Distributional Response by Elk to Development of a Natural Gas Field. Rangel Ecol Manag 67:369–379. doi: 10.2111/REM-D-13-00136.1

Bunkley JP, Barber JR (2015) Noise Reduces Foraging Efficiency in Pallid Bats ( Antrozous pallidus ). Ethology 121:1116–1121. doi: 10.1111/eth.12428

Butler LK, Ries L, Bisson I-A, et al (2013) Opposite but analogous effects of road density on songbirds with contrasting habitat preferences. Anim Conserv 16:77–85. doi: 10.1111/j.1469-1795.2012.00576.x

Byrnes P, Goosem M, Turton SM (2012) Are less vocal rainforest mammals susceptible to impacts from traffic noise? Wildl Res 39:355. doi: 10.1071/WR11010

Cao M, Xu H, Le Z, et al (2015) A Multi-Scale Approach to Investigating the Red-Crowned Crane – Habitat Relationship in the Yellow River Delta Nature Reserve , China : Implications for Conservation. 1–15. doi: 10.1371/journal.pone.0129833

Cartwright LA, Taylor DR, Wilson DR, Chow-fraser P (2014) Urban noise affects song structure and daily patterns of song production in Red-winged Blackbirds ( Agelaius phoeniceus ). 561–572. doi: 10.1007/s11252-013-0318-z

Carvalho NC De, Bordignon MO, Shapiro JT (2014) Fast and furious : a look at the death of animals on the highway MS-080, Southwestern Brazil. Iheringia, Série Zool 104:43–49. doi: 10.1590/1678-4766201410414349

Carvalho F, Carvalho R, Beja P (2016) Assessing landscape functional connectivity in a forest carnivore using path selection functions. 1021–1036. doi: 10.1007/s10980-015-0326-x

Cayuela H, Vacher JLJ, Miaud C (2015) Highlighting the effects of land-use change on a threatened amphibian in a human-dominated landscape. Popul Ecol 433–443. doi: 10.1007/s10144-015-0483-4

Červinka J, Šálek M, Padyšáková E, Šmilauer P (2013) The effects of local and landscape-scale habitat characteristics and prey availability on corridor use by carnivores: A comparison of two contrasting farmlands. J Nat Conserv 21:105–113. doi: 10.1016/j.jnc.2012.11.004

Chen HL, Koprowski JL (2016) Barrier effects of roads on an endangered forest obligate : in fl uences of traf fi c , road edges , and gaps. BIOC 199:33–40. doi: 10.1016/j.biocon.2016.03.017

Chen HL, Koprowski JL (2015) Animal occurrence and space use change in the landscape of anthropogenic noise. Biol Conserv 192:315–322. doi: 10.1016/j.biocon.2015.10.003

Cheveau M, Sustainable N, Management F (2013) Marten Space Use and Habitat Selection in Managed Coniferous Boreal Forests of Eastern Canada. 77:749–760. doi: 10.1002/jwmg.511

Christie KS, Jensen WF, Schmidt JH, Boyce MS (2015) Long-term changes in pronghorn abundance index linked to climate and oil development in North Dakota. Biol Conserv 192:445–453. doi: 10.1016/j.biocon.2015.11.007

Clark JD, Laufenberg JS, Davidson M, Murrow JL (2015) Connectivity among subpopulations of louisiana black bears as estimated by a step selection function. J Wildl Manage 79:1347–1360. doi: 10.1002/jwmg.955

Coe PK, Nielson RM, Jackson DH, et al (2015) Identifying migration corridors of mule deer threatened by highway development. Wildl Soc Bull 39:256–267. doi: 10.1002/wsb.544

Cosentino BJ, Marsh DM, Jones KS, et al (2014) Citizen science reveals widespread negative effects of roads on amphibian distributions. Biol Conserv 180:31–38. doi: 10.1016/j.biocon.2014.09.027

Costello RA, Symes LB (2014) Effects of anthropogenic noise on male signalling behaviour and female phonotaxis in Oecanthus tree crickets. Anim Behav 95:15–22. doi: 10.1016/j.anbehav.2014.05.009

Coster SS, Kovach AI (2012) Anthropogenic influences on the spatial genetic structure of black bears. Conserv Genet 13:1247–1257. doi: 10.1007/s10592-012-0368-4

Courbin N, Fortin D, Dussault C, Courtois R (2014) Logging-induced changes in habitat network connectivity shape behavioral interactions in the wolf–caribou–moose system. Ecol Monogr 84:265–285. doi: 10.1890/12-2118.1

Crawford BA, Maerz JC, Nibbelink NP, et al (2014) Estimating the consequences of multiple threats and management strategies for semi-aquatic turtles. J Appl Ecol 51:359–366. doi: 10.1111/1365-2664.12194

Cristescu B, Stenhouse GB, Boyce MS (2014) Grizzly bear ungulate consumption and the relevance of prey size to caching and meat sharing. Anim Behav 92:133–142. doi: 10.1016/j.anbehav.2014.03.020

D’Amico M, Périquet S, Román J, Revilla E (2016) Road avoidance responses determine the impact of heterogeneous road networks at a regional scale. J Appl Ecol 53:181–190. doi: 10.1111/1365-2664.12572

Da Silva A, Samplonius JM, Schlicht E, et al (2014) Artificial night lighting rather than traffic noise affects the daily timing of dawn and dusk singing in common European songbirds. Behav Ecol 25:1037–1047. doi: 10.1093/beheco/aru103

Dahl EL, Bevanger K, Nygård T, et al (2012) Reduced breeding success in white-tailed eagles at Smøla windfarm, western Norway, is caused by mortality and displacement. Biol Conserv 145:79–85. doi: 10.1016/j.biocon.2011.10.012

Dambros C de S, da Silva VNV, Azevedo R, de Morais JW (2013) Road-associated edge effects in Amazonia change termite community composition by modifying environmental conditions. J Nat Conserv 21:279–285. doi: 10.1016/j.jnc.2013.02.003

Dananay KL, Krynak KL, Krynak TJ, Benard MF (2015) Legacy of road salt: Apparent positive larval effects counteracted by negative postmetamorphic effects in wood frogs. Environ Toxicol Chem 34:2417–2424. doi: 10.1002/etc.3082

de Freitas CH, Justino CS, Setz EZF (2014) Road-kills of the giant anteater in south-eastern Brazil: 10 years monitoring spatial and temporal determinants. Wildl Res 41:673. doi: 10.1071/WR14220

de Groot GA, Hofmeester TR, La Haye M, et al (2016) Hidden dispersal in an urban world: genetic analysis reveals occasional long-distance dispersal and limited spatial substructure among Dutch pine martens. Conserv Genet 17:111–123. doi: 10.1007/s10592-015-0765-6

de Redon L, Le Viol I, Jiguet F, et al (2015) Road network in an agrarian landscape: Potential habitat, corridor or barrier for small mammals? Acta Oecologica 62:58–65. doi: 10.1016/j.actao.2014.12.003

Degregorio BA, Weatherhead PJ, Sperry JH (2014) Power lines , roads , and avian nest survival : effects on predator identity and predation intensity. 1589–1600. doi: 10.1002/ece3.1049

Delgado JD, Arroyo NL, Arévalo JR (2013) Road edge effects on litter invertebrate communities of subtropical forests

Dellinger JA, Proctor C, Steury TD, et al (2013) Habitat selection of a large carnivore , the red wolf , in a human-altered landscape. Biol Conserv 157:324–330. doi: 10.1016/j.biocon.2012.09.004

Di Blanco YE, Jiménez Pérez I, Di Bitetti MS (2015) Habitat selection in reintroduced giant anteaters: the critical role of conservation areas. J Mammal 96:1024–1035. doi: 10.1093/jmammal/gyv107

Do Y, Joo G (2015) Heterogeneity from increasing crop types: effect on carabid beetles. Entomol Res 45:314–322. doi: 10.1111/1748-5967.12141

Dobbs EK, Brown MG, Snodgrass JW, Ownby DR (2012) Salt Toxicity to Treefrogs (Hyla Chrysoscelis) Depends on Depth. Herpetologica 68:22–30. doi: 10.1655/HERPETOLOGICA-D-11-00035.1

Dolgener N, Freudenberger L, Schluck M, et al (2014) Environmental niche factor analysis ( ENFA ) relates environmental parameters to abundance and genetic diversity in an endangered amphibian , the fire-bellied-toad ( Bombina bombina ). 11–21. doi: 10.1007/s10592-013-0517-4

Downing RJ, Rytwinski T, Fahrig L (2015) Positive effects of roads on small mammals : a test of the predation release hypothesis. Ecol Res 651–662. doi: 10.1007/s11284-015-1264-4

Drewry JM, Van Manen FT, Ruth DM (2013) Density and genetic structure of black bears in coastal South Carolina. J Wildl Manage 77:153–164. doi: 10.1002/jwmg.443

Dudaniec RY, Rhodes JR, Wilmer JW (2013) Using multilevel models to identify drivers of landscape-genetic structure among management areas. 3752–3765. doi: 10.1111/mec.12359

Duquette JF, Belant JL, Svoboda NJ, et al (2015) Scale Dependence of Female Ungulate Reproductive Success in Relation to Nutritional Condition, Resource Selection and Multi-Predator Avoidance. PLoS One 10:e0140433. doi: 10.1371/journal.pone.0140433

Dussault C, Pinard V, Ouellet J-P, et al (2012) Avoidance of roads and selection for recent cutovers by threatened caribou: fitness-rewarding or maladaptive behaviour? Proc R Soc B Biol Sci 279:4481–4488. doi: 10.1098/rspb.2012.1700

Dziadzio MC, Jones JW (2016) Effect of Nest Location on Gopher Tortoise Nest Survival. 80:1314–1322. doi: 10.1002/jwmg.21116

Eberhardt E, Mitchell S, Fahrig L (2013) Road kill hotspots do not effectively indicate mitigation locations when past road kill has depressed populations. J Wildl Manage 77:1353–1359. doi: 10.1002/jwmg.592

Edwards S, Gange AC, Wiesel I (2016) An oasis in the desert: The potential of water sources as camera trap sites in arid environments for surveying a carnivore guild. J Arid Environ 124:304–309. doi: 10.1016/j.jaridenv.2015.09.009

Eisenberg C, Hibbs DE, Ripple WJ, Salwasser H (2014) Context dependence of elk ( Cervus elaphus ) vigilance and wolf ( Canis lupus ) predation risk. 736:727–736

Ejigu D, Bekele A, Powell L, Lernould JM (2015) Habitat preference of the endangered Ethiopian walia ibex ( Capra walie ) in the Simien Mountains National Park , Ethiopia. Anim Biodivers Conserv 38:1–10

Erb LA, Willey LL, Johnson LM, et al (2015) Detecting long-term population trends for an elusive reptile species. J Wildl Manage 79:1062–1071. doi: 10.1002/jwmg.921

Fey K, Hämäläinen S, Selonen V (2016) Roads are no barrier for dispersing red squirrels in an urban environment. Behav Ecol 27:741–747. doi: 10.1093/beheco/arv215

Flavenot T, Fellous S, Abdelkrim J, et al (2015) Impact of quarrying on genetic diversity: an approach across landscapes and over time. Conserv Genet 16:181–194. doi: 10.1007/s10592-014-0650-8

Fortney AN, Poulin RG, Martino JA, et al (2012) Proximity to Hibernacula and Road Type Influence Potential Road Mortality of Snakes in Southwestern Saskatchewan. Can Field-Naturalist 126:194. doi: 10.22621/cfn.v126i3.1360

Frakes RA, Belden RC, Wood BE, James FE (2015) Landscape Analysis of Adult Florida Panther Habitat. PLoS One 10:e0133044. doi: 10.1371/journal.pone.0133044

Francis CD (2015) Vocal traits and diet explain avian sensitivities to anthropogenic noise. Glob Chang Biol 21:1809–1820. doi: 10.1111/gcb.12862

Francis MJ, Spooner PG, Matthews A (2015) The influence of urban encroachment on squirrel gliders (Petaurus norfolcensis): effects of road density, light and noise pollution. Wildl Res 42:324. doi: 10.1071/WR14182

Frantz AC, Bertouille S, Eloy MC, et al (2012) Comparative landscape genetic analyses show a Belgian motorway to be a gene flow barrier for red deer ( Cervus elaphus ), but not wild boars ( Sus scrofa ). Mol Ecol 21:3445–3457. doi: 10.1111/j.1365-294X.2012.05623.x

Freitas SR, Alexandrino MM, Pardini R, et al (2012) A model of road effect using line integrals and a test of the performance of two new road indices using the distribution of small mammals in an Atlantic Forest landscape. Ecol Modell 247:64–70. doi: 10.1016/j.ecolmodel.2012.07.033

Froese GZL, Contasti AL, Mustari AH, Brodie JF (2015) Disturbance impacts on large rain-forest vertebrates differ with edge type and regional context in Sulawesi, Indonesia. J Trop Ecol 31:509–517. doi: 10.1017/S0266467415000450

Gabrielsen CG, Kovach AI, Babbitt KJ, Mcdowell WH (2013) Limited effects of suburbanization on the genetic structure of an abundant vernal pool-breeding amphibian. 1083–1097. doi: 10.1007/s10592-013-0497-4

Gagné SA, Bates JL, Bierregaard RO (2015) The effects of road and landscape characteristics on the likelihood of a Barred Owl (Strix varia)-vehicle collision. Urban Ecosyst 18:1007–1020. doi: 10.1007/s11252-015-0465-5

Gastón A, Blázquez-Cabrera S, Garrote G, et al (2016) Response to agriculture by a woodland species depends on cover type and behavioural state: insights from resident and dispersing Iberian lynx. J Appl Ecol 53:814–824. doi: 10.1111/1365-2664.12629

Geiser C, Ray N, Lehmann A, Ursenbacher S (2013) Unravelling landscape variables with multiple approaches to overcome scarce species knowledge: a landscape genetic study of the slow worm. Conserv Genet 14:783–794. doi: 10.1007/s10592-013-0474-y

Gillan JK, Sciences F, Avenue D (2013) Using Spatial Statistics and Point-Pattern Simulations to Assess the Spatial Dependency Between Greater Sage-Grouse and Anthropogenic Features. 37:301–310. doi: 10.1002/wsb.272

Grace MK, Anderson RC (2015) No frequency shift in the “D” notes of Carolina chickadee calls in response to traffic noise. Behav Ecol Sociobiol 69:253–263. doi: 10.1007/s00265-014-1838-0

Granados A, Weladji RB, Loomis MR (2012) Movement and Occurrence of Two Elephant Herds in a Human-Dominated Landscape, the Bénoué Wildlife Conservation Area, Cameroon. Trop Conserv Sci 5:150–162. doi: 10.1177/194008291200500205

Gravel M, Mazerolle MJ, Villard M (2012) Interactive effects of roads and weather on juvenile amphibian movements. Amphibia-Reptilia 33:113–127. doi: 10.1163/156853812X625512

Green AW, Bailey LL (2015) Reproductive strategy and carry-over effects for species with complex life histories. Popul Ecol 57:175–184. doi: 10.1007/s10144-014-0461-2

Grilo C, Del I, Centeno-cuadros A, et al (2016) Heterogeneous road networks have no apparent effect on the genetic structure of small mammal populations. Sci Total Environ 565:706–713. doi: 10.1016/j.scitotenv.2016.05.074

Grilo C, Ferreira FZ, Revilla E (2015) No evidence of a threshold in traffic volume affecting road-kill mortality at a large spatio-temporal scale. Environ Impact Assess Rev 55:54–58. doi: 10.1016/j.eiar.2015.07.003

Grilo C, Reto D, Filipe J, et al (2014) Understanding the mechanisms behind road effects: linking occurrence with road mortality in owls. Anim Conserv 17:555–564. doi: 10.1111/acv.12120

Grubb TG, Mountain R, Service USF, Knoll SP (2013) Response of Nesting Northern Goshawks to Logging Truck Noise in Northern Arizona. 77:1618–1625. doi: 10.1002/jwmg.607

Halfwerk W, Bot S, Slabbekoorn H (2012) Male great tit song perch selection in response to noise-dependent female feedback. Funct Ecol 26:1339–1347. doi: 10.1111/j.1365-2435.2012.02018.x

Hamer AJ (2016) Accessible habitat delineated by a highway predicts landscape-scale effects of habitat loss in an amphibian community. Landsc Ecol 31:2259–2274. doi: 10.1007/s10980-016-0398-2

Hamer AJ, Harrison LEEJ, Stokeld D (2016) Road density and wetland context alter population structure of a freshwater turtle. Austral Ecol 41:53–64. doi: 10.1111/aec.12298

Hanley ME, Wilkins JP (2015) On the verge? Preferential use of road-facing hedgerow margins by bumblebees in agro-ecosystems. J Insect Conserv 19:67–74. doi: 10.1007/s10841-014-9744-3

Harris G, Nielson RM, Rinaldi T (2014) Effects of winter recreation on northern ungulates with focus on moose ( Alces alces ) and snowmobiles. 45–58. doi: 10.1007/s10344-013-0749-0

Hasegawa M, Sasaki T, Sato H, Abe S (2015) Effects of roads on collembolan community structure in subtropical evergreen forests on Okinawa Island, southwestern Japan. Pedobiologia (Jena) 58:13–21. doi: 10.1016/j.pedobi.2014.11.002

Haskell DE, Webster CR, Flaspohler DJ, Meyer MW (2013) Relationship between Carnivore Distribution and Landscape Features in the Northern Highlands Ecological Landscape of Wisconsin. Am Midl Nat 169:1–16. doi: 10.1674/0003-0031-169.1.1

Haurez B, Petre C, Tagg N, Doucet J (2018) Western lowland gorilla density and nesting behavior in a Gabonese forest logged for 25 years : implications for gorilla conservation. 2669–2687. doi: 10.1007/s10531-014-0743-1

Heurich M, Möst L, Schauberger G, et al (2012) Survival and causes of death of European Roe Deer before and after Eurasian Lynx reintroduction in the Bavarian Forest National Park. Eur J Wildl Res 58:567–578. doi: 10.1007/s10344-011-0606-y

Hof AR, Bright PW (2012) Factors affecting hedgehog presence on farmland as assessed by a questionnaire survey. Acta Theriol (Warsz) 57:79–88. doi: 10.1007/s13364-011-0044-y

Holá M, Zíka T, Šálek M, et al (2015) Effect of habitat and game management practices on ring-necked pheasant harvest in the Czech Republic. Eur J Wildl Res 61:73–80. doi: 10.1007/s10344-014-0875-3

Holbrook JD, Vierling KT, Vierling LA, et al (2015) Occupancy of red-naped sapsuckers in a coniferous forest: using LiDAR to understand effects of vegetation structure and disturbance. Ecol Evol 5:5383–5393. doi: 10.1002/ece3.1768

Holloran MJ, Fedy BC, Dahlke J (2015) Winter habitat use of greater sage-grouse relative to activity levels at natural gas well pads. J Wildl Manage 79:630–640. doi: 10.1002/jwmg.877

Holzer KA (2014) Amphibian use of constructed and remnant wetlands in an urban landscape. Urban Ecosyst 955–968. doi: 10.1007/s11252-014-0373-0

Hopkins GR, French SS, Jr EDB (2013) Increased frequency and severity of developmental deformities in rough-skinned newt ( Taricha granulosa ) embryos exposed to road deicing salts ( NaCl & MgCl 2 ). Environ Pollut 173:264–269. doi: 10.1016/j.envpol.2012.10.002

Hosaka T, Niino M, Kon M, et al (2014) Impacts of Small-scale Clearings due to Selective logging on Dung Beetle Communities. 46:720–731

Hovick TJ, Allred BW, Elmore RD, et al (2015) Dynamic Disturbance Processes Create Dynamic Lek Site Selection in a Prairie Grouse. PLoS One 10:e0137882. doi: 10.1371/journal.pone.0137882

Hu C, Song X, Ding C, et al (2016) The Size of Winter-Flooded Paddy Fields No Longer Limits the Foraging Habitat Use of the Endangered Crested Ibis ( Nipponia nippon ) in Winter. Zoolog Sci 33:345–351. doi: 10.2108/zs150012

Hubbard KA, Chalfoun AD, Gerow KG (2016) The Relative Influence of Road Characteristics and Habitat on Adjacent Lizard Populations in Arid Shrublands. J Herpetol 50:29–36. doi: 10.1670/13-182

Husby A, Husby M (2014) Interspecific analysis of vehicle avoidance behavior in birds. Behav Ecol 25:504–508. doi: 10.1093/beheco/aru011

Jack J, Rytwinski T, Fahrig L, Francis CM (2015) Influence of traffic mortality on forest bird abundance. Biodivers Conserv 24:1507–1529. doi: 10.1007/s10531-015-0873-0

Jerina K (2012) Roads and supplemental feeding affect home-range size of Slovenian red deer more than natural factors. J Mammal 93:1139–1148. doi: 10.1644/11-MAMM-A-136.1

Jiang G, Sun H, Lang J, et al (2014) Effects of environmental and anthropogenic drivers on Amur tiger distribution in northeastern China. Ecol Res 29:801–813. doi: 10.1007/s11284-014-1160-3

Johnson CJ, Ehlers LPW, Seip DR (2015) Witnessing extinction – Cumulative impacts across landscapes and the future loss of an evolutionarily significant unit of woodland caribou in Canada. Biol Conserv 186:176–186. doi: 10.1016/j.biocon.2015.03.012

Johnson PTJ, Hoverman JT, Mckenzie VJ, et al (2013) Urbanization and wetland communities : applying metacommunity theory to understand the local and landscape effects. 34–42. doi: 10.1111/1365-2664.12022

Jongsma GFM, Hedley RW, Durães R, Karubian J (2014) Amphibian Diversity and Species Composition in Relation to Habitat Type and Alteration in the Mache–Chindul Reserve, Northwest Ecuador. Herpetologica 70:34–46. doi: 10.1655/HERPETOLOGICA-D-12-00068

Kaiser K, Devito J, Jones CG, et al (2015) Effects of anthropogenic noise on endocrine and reproductive function in White’s treefrog, Litoria caerulea. Conserv Physiol 3:cou061. doi: 10.1093/conphys/cou061

Kambourova-Ivanova N, Koshev Y, Popgeorgiev G, et al (2012) Effect of traffic on mortality of amphibians, reptiles, birds and mammals on two types of roads between Pazardzhik and Plovdiv region (Bulgaria) - Preliminary results. Acta Zool Bulg 64:57–67

Kaminski KJ, Islam K (2013) Effects of Forest Treatments on Abundance and Spatial Characteristics of Cerulean Warbler Territories. Am Midl Nat 170:111–120. doi: 10.1674/0003-0031-170.1.111

Kang D, Wang X, Yang H, et al (2014) Habitat use by giant pandas ( Ailuropoda melanoleuca ) in relation to roads in the Wanglang Nature Reserve, People’s Republic of China. Can J Zool 92:715–719. doi: 10.1139/cjz-2014-0088

Karelus DL, McCown JW, Scheick BK, et al (2016) Home Ranges and Habitat Selection by Black Bears in a Newly Colonized Population in Florida. Southeast Nat 15:346–364. doi: 10.1656/058.015.0215

Kaunert MD, McBrayer LD (2015) Population density of the Florida scrub lizard (Sceloporus woodi) in managed Florida scrub and longleaf pine sandhil habitats. Herpetol Conserv Biol 10:883–893

Keret N, Välimäki P, Mutanen M, Shanas U (2015) Large Roads Disrupt Insect Movement: A Case Study of the Spodoptera littoralis (Lepidoptera: Noctuidae). J Insect Behav 544–554. doi: 10.1007/s10905-015-9522-4

Kern JM, Radford AN (2016) Anthropogenic noise disrupts use of vocal information about. Environ Pollut 218:988–995. doi: 10.1016/j.envpol.2016.08.049

Khaleghizadeh A, Anuar S (2014) Nest tree selection by the brahminy kite Haliastur indus in a Rhizophora mangrove forest. Trop Zool 27:40–52. doi: 10.1080/03946975.2014.936751

Kouffeld MJ, Larson MA, Gutiérrez RJ (2013) Selection of landscapes by male ruffed grouse during peak abundance. J Wildl Manage 77:1192–1201. doi: 10.1002/jwmg.578

Kowal VA, Cartar R V. (2012) Edge effects of three anthropogenic disturbances on spider communities in Alberta’s boreal forest. J Insect Conserv 16:613–627. doi: 10.1007/s10841-011-9446-z

Kowalski B, Watson F, Garza C, Delgado B (2015) Effects of landscape covariates on the distribution and detection probabilities of mammalian carnivores. J Mammal 96:511–521. doi: 10.1093/jmammal/gyv056

Lampe U, Schmoll T, Franzke A, Reinhold K (2012) Staying tuned: Grasshoppers from noisy roadside habitats produce courtship signals with elevated frequency components. Funct Ecol 26:1348–1354. doi: 10.1111/1365-2435.12000

Laporte M, Beaudry CS (2013) Effects of road proximity on genetic diversity and reproductive success of the painted turtle ( Chrysemys picta ). 21–30. doi: 10.1007/s10592-012-0419-x

Laurence S, Smith MJ, Schulte-hostedde AI (2013) Effects of structural connectivity on fine scale population genetic structure of muskrat , Ondatra zibethicus. doi: 10.1002/ece3.741

Lawes TJ, Anthony RG, Robinson WD, et al (2012) Homing Behavior and Survival of Pygmy Rabbits After Experimental Translocation. West North Am Nat 72:569–581. doi: 10.3398/064.072.0418

Leblond M, Dussault C, Ouellet J-P (2013) Avoidance of roads by large herbivores and its relation to disturbance intensity. J Zool 289:32–40. doi: 10.1111/j.1469-7998.2012.00959.x

Leblond M, Dussault C, St-Laurent M-H (2015) Low-density spruce plantations increase foraging by moose in a northeastern temperate forest. For Ecol Manage 347:228–236. doi: 10.1016/j.foreco.2015.03.034

Leclerc M, Lamoureux J, St-Laurent MH (2012) Influence of young black spruce plantations on moose winter distribution. J Wildl Manage 76:1686–1693. doi: 10.1002/jwmg.419

Lee JS, Ruell EW, Boydston EE, et al (2012) Gene flow and pathogen transmission among bobcats (Lynx rufus) in a fragmented urban landscape. Mol Ecol 21:1617–1631. doi: 10.1111/j.1365-294X.2012.05493.x

Legagneux P, Ducatez S (2013) European birds adjust their flight initiation distance to road speed limits. Biol Lett 9:20130417. doi: 10.1098/rsbl.2013.0417

Lin S-C (2015) The width of edge effects of road construction on fauna and ecologically critical road density. J Environ Eng Landsc Manag 23:241–250. doi: 10.3846/16486897.2015.1054290

Lin S-M, Lee Y, Chen T-H, Lin J-W (2015) Habitat Preference and Management of a Chinese Pond Turtle Population Protected by the Demilitarized Kinmen Islands. J Herpetol 49:399–404. doi: 10.1670/14-012

Litvaitis J a, Reed GC, Carroll RP, et al (2015) Bobcats (Lynx rufus) as a Model Organism to Investigate the Effects of Roads on Wide-Ranging Carnivores. Environ Manage 55:1366–1376. doi: 10.1007/s00267-015-0468-2

Llaneza L, López-Bao J V., Sazatornil V (2012) Insights into wolf presence in human-dominated landscapes: The relative role of food availability, humans and landscape attributes. Divers Distrib 18:459–469. doi: 10.1111/j.1472-4642.2011.00869.x

Ludlow SM, Brigham RM, Davis SK (2015) Oil and natural gas development has mixed effects on the density and reproductive success of grassland songbirds. Condor 117:64–75. doi: 10.1650/CONDOR-14-79.1

Luepold SHB, Hodgman TP, McNulty SA, et al (2015) Habitat selection, nest survival, and nest predators of Rusty Blackbirds in northern New England, USA. Condor 117:609–623. doi: 10.1650/CONDOR-14-215.1

Lukanov S, Simeonovska-nikolova D, Tzankov N (2014) Effects of traffic noise on the locomotion activity and vocalization of the Marsh Frog , Pelophylax ridibundus. 10:359–364

Lunde ET, Bech C, Fyumagwa RD, et al (2016) Assessing the effect of roads on impala ( Aepyceros melampus ) stress levels using faecal glucocorticoid metabolites. 434–441

Luo J, Siemers BM, Koselj K (2015) How anthropogenic noise affects foraging. Glob Chang Biol 21:3278–3289. doi: 10.1111/gcb.12997

Luther DA, Derryberry EP (2012) Birdsongs keep pace with city life: Changes in song over time in an urban songbird affects communication. Anim Behav 83:1059–1066. doi: 10.1016/j.anbehav.2012.01.034

Mammides C, Kadis C, Coulson T (2015) The effects of road networks and habitat heterogeneity on the species richness of birds in Natura 2000 sites in Cyprus. Landsc Ecol 30:67–75. doi: 10.1007/s10980-014-0100-5

Mammides C, Kounnamas C, Goodale E, Kadis C (2016) Do unpaved, low-traffic roads affect bird communities? Acta Oecologica 71:14–21. doi: 10.1016/j.actao.2016.01.004

Manikowska-Ślepowrońska B, Lazarus M, Żółkoś K, Jakubas D (2015) Determinants of the re-occupation and size of Grey Heron Ardea cinerea breeding colonies in northern Poland. Ecol Res 30:879–888. doi: 10.1007/s11284-015-1288-9

Manikowska-Ślepowrońska B, Ślepowroński K, Jakubas D (2016) Grey Heron Ardea cinerea Productivity in Relation to Habitat Features and Different Spatial Scales. Polish J Ecol 64:384–398. doi: 10.3161/15052249PJE2016.64.3.008

Marshall ME, Long AM, Farrell SL, et al (2012) Using impact assessment study designs for addressing impacts to species of conservation concern. Wildl Soc Bull 36:450–456. doi: 10.1002/wsb.179

Maynard RJ, Aall NC, Saenz D, et al (2016) Road-edge Effects on Herpetofauna in a Lowland Amazonian Rainforest Tropical forests harbor immense levels of biodiversity that includes roughly half of the world ’ s terrestrial. 9:264–290

McCleery RA, Holdorf AR, Hubbard LL, Peer BD (2015) Maximizing the wildlife conservation value of road right-of-ways in an agriculturally dominated landscape. PLoS One 10:1–19. doi: 10.1371/journal.pone.0120375

Mcclure CJW, Ware HE, Carlisle J, et al (2013) An experimental investigation into the effects of traffic noise on distributions of birds : avoiding the phantom road

McLaughlin KE, Kunc HP (2013) Experimentally increased noise levels change spatial and singing behaviour. Biol Lett 9:20120771. doi: 10.1098/rsbl.2012.0771

Meillère A, Brischoux F, Angelier F (2015a) Impact of chronic noise exposure on antipredator behavior: an experiment in breeding house sparrows. Behav Ecol 26:569–577. doi: 10.1093/beheco/aru232

Meillère A, Brischoux F, Ribout C, Angelier F (2015b) Traffic noise exposure affects telomere length in nestling house sparrows. Biol Lett 11:20150559. doi: 10.1098/rsbl.2015.0559

Meisingset EL, Loe LE, Brekkum Ø, et al (2013) Red deer habitat selection and movements in relation to roads. J Wildl Manage 77:181–191. doi: 10.1002/jwmg.469

Meisingset EL, Loe LE, Brekkum Ø, Mysterud A (2014) Targeting mitigation efforts: The role of speed limit and road edge clearance for deer-vehicle collisions. J Wildl Manage 78:679–688. doi: 10.1002/jwmg.712

Millar CS, Blouin-Demers G (2012) Habitat suitability modelling for species at risk is sensitive to algorithm and scale: A case study of Blanding’s turtle, Emydoidea blandingii, in Ontario, Canada. J Nat Conserv 20:18–29. doi: 10.1016/j.jnc.2011.07.004

Montague MJ, Danek-Gontard M, Kunc HP (2013) Phenotypic plasticity affects the response of a sexually selected trait to anthropogenic noise. Behav Ecol 24:343–348. doi: 10.1093/beheco/ars169

Montgomery RA, Roloff GJ, Millspaugh JJ (2012) Importance of visibility when evaluating animal response to roads. Wildlife Biol 18:393–405. doi: 10.2981/11-123

Moreau G, Fortin D, Couturier S, Duchesne T (2012) Multi-level functional responses for wildlife conservation: The case of threatened caribou in managed boreal forests. J Appl Ecol 49:611–620. doi: 10.1111/j.1365-2664.2012.02134.x

Moreira-Arce D, Vergara PM, Boutin S (2015) Diurnal human activity and introduced species affect occurrence of carnivores in a human-dominated landscape. PLoS One 10:1–19. doi: 10.1371/journal.pone.0137854

Morelli F (2013) Are the nesting probabilities of the red-backed shrike related to proximity to roads ? 11:1–11. doi: 10.3897/natureconservation.5.4511

Morelli F, Jerzak L, Pruscini F, et al (2015a) Testing bird response to roads on a rural environment: A case study from Central Italy. Acta Oecologica 69:146–152. doi: 10.1016/J.ACTAO.2015.10.006

Morelli F, Mróz E, Pruscini F, et al (2015b) Habitat structure, breeding stage and sex affect hunting success of breeding Red-backed Shrike ( Lanius collurio ). Ethol Ecol Evol 28:1–12. doi: 10.1080/03949370.2015.1022907

Morelli F, Santolini R, Sisti D (2012) Breeding habitat of red-backed shrike Lanius collurio on farmland hilly areas of Central Italy: Is functional heterogeneity one important key? Ethol Ecol Evol 24:127–139. doi: 10.1080/03949370.2011.635696

Morovati M, Karami M, Kaboli M (2014) Desirable Areas and Effective Environmental Factors of Wild goat Habitat ( Capra aegagrus ). Int J Environ Res 8:1031–1040. doi: 10.22059/ijer.2014.797

Morovati M, Panahandeh M, Rousta Z, Shorakaei MJ (2015) HABITAT DESIRABILITY MODELING OF CHEETAH (ACINONYX JUBATUS VENATICUS) USING MAXIMUM ENTROPY MODEL IN CENTRAL IRAN (A CASE STUDY: YAZD PROVINCE- DAREH ANJIR WILDLIFE REFUGE). Appl Ecol Environ Res 13:725–739. doi: 10.15666/aeer/1303_725739

Mulero-Pázmány M, D’Amico M, González-Suárez M (2016) Ungulate behavioral responses to the heterogeneous road-network of a touristic protected area in Africa. J Zool 298:233–240. doi: 10.1111/jzo.12310

Muller LI, Hackworth AM, Giffen NR, et al (2014) Spatial and temporal relationships between deer harvest and deer-vehicle collisions at Oak Ridge Reservation, Tennessee. Wildl Soc Bull 38:812–820. doi: 10.1002/wsb.446

Munguia-vega A, Rodriguez-estrella R, Shaw WW, Culver M (2013) Localized extinction of an arboreal desert lizard caused by habitat fragmentation. Biol Conserv 157:11–20. doi: 10.1016/j.biocon.2012.06.026

Munro KG, Bowman J, Fahrig L (2012) Effect of paved road density on abundance of white-tailed deer. Wildl Res 39:478–487. doi: 10.1071/WR11152

Munshi-South J (2012) Urban landscape genetics: Canopy cover predicts gene flow between white-footed mouse (Peromyscus leucopus) populations in New York City. Mol Ecol 21:1360–1378. doi: 10.1111/j.1365-294X.2012.05476.x

Murrieta-Galindo R, L??pez-Barrera F, Gonz??lez-Romero A, Parra-Olea G (2013) Matrix and habitat quality in a montane cloud-forest landscape: Amphibians in coffee plantations in central Veracruz, Mexico. Wildl Res 40:25–35. doi: 10.1071/WR12076

Murrow JL, Thatcher CA, Manen FT Van, Clark JD (2013) A Data-Based Conservation Planning Tool for Florida Panthers. 159–170. doi: 10.1007/s10666-012-9336-0

Mustonen AM, Lempiäinen T, Aspelund M, et al (2012) Application of change-point analysis to determine winter sleep patterns of the raccoon dog (Nyctereutes procyonoides) from body temperature recordings and a multi-faceted dietary and behavioral study of wintering. BMC Ecol 12:. doi: 10.1186/1472-6785-12-27

Mutter M, Pavlacky DC, Van Lanen NJ, Grenyer R (2015) Evaluating the impact of gas extraction infrastructure on the occupancy of sagebrush-obligate songbirds. Ecol Appl 25:1175–1186. doi: 10.1890/14-1498.1

Nafus MG, Tuberville TD, Buhlmann KA, Todd BD (2013) Relative abundance and demographic structure of Agassiz ’ s desert tortoise ( Gopherus agassizii ) along roads of varying size and traffic volume. Biol Conserv 162:100–106. doi: 10.1016/j.biocon.2013.04.009

Nakabayashi M, Nakashima Y, Bernard H, Kohshima S (2014) Utilisation of gravel roads and roadside forests by the common palm civet ( Paradoxurus hermaphroditus ) in Sabah , Malaysia. 7600:379–388

Neame LA, Griswold T, Elle E, et al (2013) Pollinator nesting guilds respond differently to urban habitat fragmentation in an oak-savannah ecosystem. 57–66. doi: 10.1111/j.1752-4598.2012.00187.x

Neumann W, Ericsson G, Dettki H, Radeloff VC (2013) Behavioural response to infrastructure of wildlife adapted to natural disturbances. Landsc Urban Plan 114:9–27. doi: 10.1016/j.landurbplan.2013.02.002

Norris DR, Flockhart DTT, Strickland D (2013) Contrasting patterns of survival and dispersal in multiple habitats reveal an ecological trap in a food-caching bird. Oecologia 173:827–835. doi: 10.1007/s00442-013-2680-1

Northrup JM, Anderson CR, Wittemyer G (2015) Quantifying spatial habitat loss from hydrocarbon development through assessing habitat selection patterns of mule deer. Glob Chang Biol 21:3961–3970. doi: 10.1111/gcb.13037

Northrup JM, Pitt J, Muhly TB, et al (2012) Vehicle traffic shapes grizzly bear behaviour on a multiple-use landscape. J Appl Ecol 49:1159–1167. doi: 10.1111/j.1365-2664.2012.02180.x

Nyhof PE, Trulio L (2015) Basking Western Pond Turtle Response to Recreational Trail Use in Urban California. Chelonian Conserv Biol 14:182–184. doi: 10.2744/CCB-1140.1

Oden AI, Bomberger Brown M, Burbach ME, et al (2015) Variation in Avian Vocalizations during the Non-Breeding Season in Response to Traffic Noise. Ethology 121:472–479. doi: 10.1111/eth.12360

Orci KM, Petróczki K, Barta Z (2016) Instantaneous song modification in response to fluctuating traffic noise in the tree cricket Oecanthus pellucens. Anim Behav 112:187–194. doi: 10.1016/j.anbehav.2015.12.008

Ordiz A, Milleret C, Kindberg J, et al (2015) Wolves, people, and brown bears influence the expansion of the recolonizing wolf population in Scandinavia. Ecosphere 6:art284. doi: 10.1890/ES15-00243.1

Owens JL, Stec CL, O’Hatnick A (2012) The effects of extended exposure to traffic noise on parid social and risk-taking behavior. Behav Processes 91:61–69. doi: 10.1016/j.beproc.2012.05.010

Parks LC, Wallin DO, Cushman SA, Mcrae BH (2015) Landscape-level analysis of mountain goat population connectivity in Washington and southern British Columbia. Conserv Genet 16:1195–1207. doi: 10.1007/s10592-015-0732-2

Patthey P, Signorell N, Rotelli L, Arlettaz R (2012) Vegetation structural and compositional heterogeneity as a key feature in Alpine black grouse microhabitat selection: Conservation management implications. Eur J Wildl Res 58:59–70. doi: 10.1007/s10344-011-0540-z

Peaden JM, Tuberville TD, Buhlmann KA, et al (2015) Delimiting road-effect zones for threatened species: implications for mitigation fencing. Wildl Res 42:650. doi: 10.1071/WR15082

Petranka JW, Francis RA (2013) Effects of road salts on seasonal wetlands: Poor prey performance may compromise growth of predatory salamanders. Wetlands 33:707–715. doi: 10.1007/s13157-013-0428-7

Pettinga D, Kennedy J, Proppe DS (2016) Common urban birds continue to perceive predator calls that are overlapped by road noise. 373–382. doi: 10.1007/s11252-015-0498-9

Pigeon KE, Nielsen SE, Stenhouse GB, Côté SD (2014) Den selection by grizzly bears on a managed landscape. J Mammal 95:559–571. doi: 10.1644/13-MAMM-A-137

Pinard V, Dussault C, Ouellet JP, et al (2012) Calving rate, calf survival rate, and habitat selection of forest-dwelling caribou in a highly managed landscape. J Wildl Manage 76:189–199. doi: 10.1002/jwmg.217

Pisa G, Orioli V, Spilotros G, et al (2015) Detecting a hierarchical genetic population structure: the case study of the Fire Salamander ( Salamandra salamandra ) in Northern Italy. Ecol Evol 5:743–758. doi: 10.1002/ece3.1335

Planillo A, Kramer-Schadt S, Malo JE (2015) Transport infrastructure shapes foraging habitat in a raptor community. PLoS One 10:1–20. doi: 10.1371/journal.pone.0118604

Planillo A, Malo JE (2013) Motorway verges : Paradise for prey species ? A case study with the European rabbit. Mamm Biol 78:187–192. doi: 10.1016/j.mambio.2012.11.001

Poel JL Van De, Dekker J, Langevelde F Van (2015) Dutch hedgehogs Erinaceus europaeus are nowadays mainly found in urban areas, possibly due to the negative Effects of badgers Meles meles. Wildlife Biol 21:51–55. doi: 10.2981/wlb.00072

Poessel SA, Burdett CL, Boydston EE, et al (2014) Roads influence movement and home ranges of a fragmentation- sensitive carnivore , the bobcat , in an urban landscape. Biol Conserv 180:224–232. doi: 10.1016/j.biocon.2014.10.010

Potvin DA, MacDougall-Shackleton SA (2015a) Experimental chronic noise exposure affects adult song in zebra finches. Anim Behav 107:201–207. doi: 10.1016/j.anbehav.2015.06.021

Potvin DA, MacDougall-Shackleton SA (2015b) Traffic noise affects embryo mortality and nestling growth rates in captive zebra finches. J Exp Zool Part A Ecol Genet Physiol 323:722–730. doi: 10.1002/jez.1965

Proctor MF, Nielsen SE, Kasworm WF, et al (2015) Grizzly bear connectivity mapping in the Canada-United States trans-border region. J Wildl Manage 79:544–558. doi: 10.1002/jwmg.862

Proctor MF, Paetkau D, McLellan BN, et al (2012) Population fragmentation and inter-ecosystem movements of grizzly bears in Western Canada and the Northern United States. Wildl Monogr 1–46. doi: 10.1002/wmon.6

Proppe DS, Byers K, Sturdy CB, St. Clair CC (2013a) Physical condition of Black-capped Chickadees ( Poecile atricapillus ) in relation to road disturbance. Can J Zool 91:842–845. doi: 10.1139/cjz-2013-0081

Proppe DS, Sturdy CB, St. Clair CC (2013b) Anthropogenic noise decreases urban songbird diversity and may contribute to homogenization. Glob Chang Biol 19:1075–1084. doi: 10.1111/gcb.12098

Proulx CL, Fortin G, Blouin-Demers G (2014) Blanding’s Turtles ( Emydoidea blandingii ) Avoid Crossing Unpaved and Paved Roads. J Herpetol 48:267–271. doi: 10.1670/12-176

Prunier JG, Kaufmann B, Léna J-P, et al (2014) A 40-year-old divided highway does not prevent gene flow in the alpine newt Ichthyosaura alpestris. Conserv Genet 15:453–468. doi: 10.1007/s10592-013-0553-0

Pusparini W, Sievert PR, Fuller TK, et al (2015) Rhinos in the Parks: An Island-Wide Survey of the Last Wild Population of the Sumatran Rhinoceros. PLoS One 10:e0136643. doi: 10.1371/journal.pone.0136643

Qi D, Xu C, Hou R, et al (2015) Using habitat models to evaluate protected area designing for giant pandas. Folia Zool 64:56–64. doi: 10.25225/fozo.v64.i1.a7.2015

Quesnelle PE, Fahrig L, Lindsay KE (2013) Effects of habitat loss , habitat configuration and matrix composition on declining wetland species. Biol Conserv 160:200–208. doi: 10.1016/j.biocon.2013.01.020

Quiroga VA, Noss AJ, Paviolo A, et al (2016) Puma density , habitat use and conflict with humans in the Argentine Chaco. J Nat Conserv 31:9–15. doi: 10.1016/j.jnc.2016.02.004

Raab R, Schütz C, Spakovszky P, et al (2015) Optimising the attractiveness of winter oilseed rape fields as foraging habitat for the West Pannonian Great Bustard Otis tarda population during winter. Bird Conserv Int 25:366–376. doi: 10.1017/S0959270914000355

Ramos-robles M, Gallina S (2013) Habitat and human factors associated with white-tailed deer density in the tropical dry forest of Tehuacán-Cuicatlán Biosphere Reserve , Mexico. 6:70–86

Raquel AJ, Ringelman KM, Ackerman JT, Eadie JM (2015) Habitat Edges Have Weak Effects on Duck Nest Survival at Local Spatial Scales. Ardea 103:155–162. doi: 10.5253/arde.v103i2.a4

Rivas LF, Novaro AJ, Funes MC, Walker RS (2015) Rapid Assessment of Distribution of Wildlife and Human Activities for Prioritizing Conservation Actions in a Patagonian Landscape. PLoS One 10:e0127265. doi: 10.1371/journal.pone.0127265

Robinson SJ, Samuel MD, Lopez DL, Shelton P (2012) The walk is never random: Subtle landscape effects shape gene flow in a continuous white-tailed deer population in the Midwestern United States. Mol Ecol 21:4190–4205. doi: 10.1111/j.1365-294X.2012.05681.x

Robson LE, Blouin-Demers G (2013) Eastern Hognose Snakes ( Heterodon platirhinos ) Avoid Crossing Paved Roads, but Not Unpaved Roads. Copeia 2013:507–511. doi: 10.1643/CE-12-033

Rooney RC, Bayley SE, Creed IF, Wilson MJ (2012) The accuracy of land cover-based wetland assessments is influenced by landscape extent. Landsc Ecol 27:1321–1335. doi: 10.1007/s10980-012-9784-6

Rota E, Caruso T, Migliorini M, et al (2015) Diversity and abundance of soil arthropods in urban and suburban holm oak stands. Urban Ecosyst 18:715–728. doi: 10.1007/s11252-014-0425-5

Rotholz E, Mandelik Y (2013) Roadside habitats: effects on diversity and composition of plant, arthropod, and small mammal communities. Biodivers Conserv 22:1017–1031. doi: 10.1007/s10531-013-0465-9

Ruiz-capillas P, Mata C, Malo JE (2015) How many rodents die on the road ? Biological and methodological implications from a small mammals ’ roadkill assessment on a Spanish motorway. Ecol Res 417–427. doi: 10.1007/s11284-014-1235-1

Ruiz-Capillas P, Mata C, Malo JE (2013a) Road verges are refuges for small mammal populations in extensively managed Mediterranean landscapes. Biol Conserv 158:223–229. doi: 10.1016/j.biocon.2012.09.025

Ruiz-Capillas P, Mata C, Malo JE (2013b) Community Response of Mammalian Predators and Their Prey to Motorways: Implications for Predator–Prey Dynamics. Ecosystems 16:617–626. doi: 10.1007/s10021-013-9634-7

Sánchez-García C, Alonso ME, Bartolomé DJ, et al (2012) Survival, home range patterns, probable causes of mortality, and den-site selection of the Iberian hare (Lepus, Leporidae, Mammalia) on arable farmland in north-west Spain. Ital J Zool 79:590–597. doi: 10.1080/11250003.2012.685109

Scobie C, Bayne E, Wellicome T (2014) Influence of anthropogenic features and traffic disturbance on burrowing owl diurnal roosting behavior. 24:73–83. doi: 10.3354/esr00577

Sexson MG, Farley GH (2012) Snowy plover nest survival in Kansas and effective management to counter negative effects of precipitation. J Wildl Manage 76:1587–1596. doi: 10.1002/jwmg.405

Sfougaris AI, Plexida SG, Solomou AD (2014) Assessing the effects of environmental factors on the presence and density of three shrike species in a continental and a coastal area of central Greece. 10:101–109

Shannon G, Angeloni LM, Wittemyer G, et al (2014) Road traffic noise modifies behaviour of a keystone species. Anim Behav 94:135–141. doi: 10.1016/j.anbehav.2014.06.004

Shannon G, Crooks KR, Wittemyer G, et al (2016) Road noise causes earlier predator detection and flight response in a free-ranging mammal. Behav Ecol 27:1370–1375. doi: 10.1093/beheco/arw058

Shao M, Guo H, Cui P, et al (2015) Habitat Selection of Wintering Chinese Merganser , Mergus squamatus. Pak J Zool 47:1421–1426

Shier DM, Lea AJ, Owen MA (2012) Beyond masking: Endangered Stephen’s kangaroo rats respond to traffic noise with footdrumming. Biol Conserv 150:53–58. doi: 10.1016/j.biocon.2012.03.007

Simek SL, Belant JL, Fan Z, et al (2015) Source populations and roads affect American black bear recolonization. Eur J Wildl Res 61:583–590. doi: 10.1007/s10344-015-0933-5

Singh NJ, Borger L, Dettki H, et al (2012) From migration to nomadisms: movement variability in a northern ungulate across its latitudinal range. Ecol Appl 22:2007–2020. doi: 10.2307/1942049

Skarin A, Nellemann C, Rönnegård L, et al (2015) Wind farm construction impacts reindeer migration and movement corridors. Landsc Ecol 30:1527–1540. doi: 10.1007/s10980-015-0210-8

Skórka P, Lenda M, Moroń D, et al (2013) Factors affecting road mortality and the suitability of road verges for butterflies. Biol Conserv 159:148–157. doi: 10.1016/j.biocon.2012.12.028

Skórka P, Lenda M, Moroń D, et al (2015) Biodiversity collision blackspots in Poland: Separation causality from stochasticity in roadkills of butterflies. Biol Conserv 187:154–163. doi: 10.1016/j.biocon.2015.04.017

Sliwinski MS, Koper N (2012) Grassland Bird Responses to Three Edge Types in a Fragmented Mixed- Grass Prairie. Avian Conserv Ecol 7:6. doi: 10.5751/ACE-00534-070206

Snow NP, Andelt WF (2013) Capture success higher near roads for san clemente island foxes. Wildl Soc Bull 37:n/a-n/a. doi: 10.1002/wsb.295

Snow NP, Andelt WF, Stanley TR, et al (2012) Effects of roads on survival of San Clemente Island foxes. J Wildl Manage 76:243–252. doi: 10.1002/jwmg.247

Soh YH, Carrasco LR, Miquelle DG, et al (2014) Spatial correlates of livestock depredation by Amur tigers in Hunchun, China: Relevance of prey density and implications for protected area management. Biol Conserv 169:117–127. doi: 10.1016/j.biocon.2013.10.011

Sorensen AA, Stenhouse GB, Bourbonnais ML, Nelson TA (2015) Effects of habitat quality and anthropogenic disturbance on grizzly bear ( Ursus arctos horribilis ) home-range fidelity. Can J Zool 93:857–865. doi: 10.1139/cjz-2015-0095

Stephens HC, Schmuki C, Burridge CP, O’reilly-Wapstra JM (2013) Habitat fragmentation in forests affects relatedness and spatial genetic structure of a native rodent, Rattus lutreolus. Austral Ecol 38:568–580. doi: 10.1111/aec.12001

Stewart BP, Nelson TA, Laberee K, et al (2013) Quantifying grizzly bear selection of natural and anthropogenic edges. J Wildl Manage 77:957–964. doi: 10.1002/jwmg.535

Steyaert SMJG, Zedrosser A, Rosell F (2015) Socio‑ecological features other than sex affect habitat selection in the socially obligate monogamous Eurasian beaver. Oecologia 179:1023–1032. doi: 10.1007/s00442-015-3388-1

Stillfried M, Belant JL, Svoboda NJ, et al (2015) When top predators become prey : Black bears alter movement behaviour in response to hunting pressure. Behav Processes 120:30–39. doi: 10.1016/j.beproc.2015.08.003

Stonehouse KF, Shipley LA, Lowe J, et al (2015) Habitat selection and use by sympatric, translocated greater sage-grouse and Columbian sharp-tailed grouse. J Wildl Manage 79:1308–1326. doi: 10.1002/jwmg.990

Strasser EH, Heath JA (2013) Reproductive failure of a human-tolerant species, the American kestrel, is associated with stress and human disturbance. J Appl Ecol 50:912–919. doi: 10.1111/1365-2664.12103

Suárez E, Zapata-Ríos G, Utreras V, et al (2013) Controlling access to oil roads protects forest cover, but not wildlife communities: A case study from the rainforest of Yasuní Biosphere Reserve (Ecuador). Anim Conserv 16:265–274. doi: 10.1111/j.1469-1795.2012.00592.x

Syrbe R, Michel E, Walz U (2013) Structural indicators for the assessment of biodiversity and their connection to the richness of avifauna. Ecol Indic 31:89–98. doi: 10.1016/j.ecolind.2013.02.018

Takahata C, Nishino S, Kido K, Izumiyama S (2013) An evaluation of habitat selection of Asiatic black bears in a season of prevalent conflicts. Ursus 24:16–26. doi: 10.2192/URSUS-D-11-00018.1

Tanadini M, Schmidt BR, Meier P, et al (2012) Maintenance of biodiversity in vineyard-dominated landscapes: A case study on larval salamanders. Anim Conserv 15:136–141. doi: 10.1111/j.1469-1795.2011.00492.x

Tanner EP, Elmore RD, Davis CA, et al (2016) Does the presence of Oil and gas infrastructure potentially increase risk of harvest in northern bobwhite? Wildlife Biol 22:294–304. doi: 10.2981/wlb.00254

Taraborelli P, Ovejero R, Torres MEM (2014) Different factors that modify anti-predator behaviour in guanacos ( Lama guanicoe ). 529–539. doi: 10.1007/s13364-014-0186-9

Tattoni C, Bragalanti N, Groff C, Rovero F (2015) Patterns in the use of rub trees by the Eurasian Brown Bear. Hystrix, Ital J Mammology 26:. doi: https://doi.org/10.4404/hystrix-26.2-11414

Taylor KL, Beck JL, Huzurbazar S V. (2016) Factors Influencing Winter Mortality Risk for Pronghorn Exposed to Wind Energy Development. Rangel Ecol Manag 69:108–116. doi: 10.1016/j.rama.2015.12.003

Tennessen JB, Parks SE, Langkilde T (2014) Traffic noise causes physiological stress and impairs breeding migration behaviour in frogs. Conserv Physiol 2:cou032-cou032. doi: 10.1093/conphys/cou032

Thompson SJ, Johnson DH, Niemuth ND, Ribic CA (2015) Avoidance of unconventional oil wells and roads exacerbates habitat loss for grassland birds in the North American great plains. Biol Conserv 192:82–90. doi: 10.1016/j.biocon.2015.08.040

Thurfjell H, Spong G, Olsson M, Ericsson G (2015) Avoidance of high traffic levels results in lower risk of wild boar-vehicle accidents. Landsc Urban Plan 133:98–104. doi: 10.1016/j.landurbplan.2014.09.015

Timmer JM, Butler MJ, Ballard WB, et al (2014) Spatially explicit modeling of lesser prairie-chicken lek density in Texas. J Wildl Manage 78:142–152. doi: 10.1002/jwmg.646

Trochet A, Chevalier H Le, Baillat B, et al (2016) Intra-specific variability of hindlimb length in the palmate newt : an indicator of population isolation induced by habitat fragmentation ?

Troïanowski M, Condette C, Mondy N, et al (2015) Traffic noise affects colouration but not calls in the European treefrog (Hyla arborea). Behaviour 152:821–836. doi: 10.1163/1568539X-00003255

Uboni A, Smith DW, Mao JS, et al (2015) Long- and short-term temporal variability in habitat selection of a top predator. Ecosphere 6:art51. doi: 10.1890/ES14-00419.1

Valero E, Picos J, Lagos L, Álvarez X (2015) Road and traffic factors correlated to wildlife–vehicle collisions in Galicia (Spain). Wildl Res 42:25. doi: 10.1071/WR14060

Vanthomme H, Kolowski J, Korte L, Alonso A (2013) Distribution of a Community of Mammals in Relation to Roads and Other Human Disturbances in Gabon, Central Africa. Conserv Biol 27:281–291. doi: 10.1111/cobi.12017

Vargas-Salinas F, Amézquita A (2013) Traffic noise correlates with calling time but not spatial distribution in the threatened poison frog Andinobates bombetes. Behaviour 150:569–584. doi: 10.1163/1568539X-00003068

Vargas-salinas F, Cunnington GM (2014) Does traffic noise alter calling time in frogs and toads ? A case study of anurans in Eastern Ontario , Canada. 945–953. doi: 10.1007/s11252-014-0374-z

Végvári Z, Valkó O, Deák B, et al (2016) EFFECTS OF LAND USE AND WILDFIRES ON THE HABITAT SELECTION OF GREAT BUSTARD ( OTIS TARDA L .) — IMPLICATIONS FOR SPECIES. 918:910–918

Vieira-neto EHM, Vasconcelos HL, Bruna EM (2016) Roads increase population growth rates of a native leaf-cutter ant in Neotropical savannahs. 983–992. doi: 10.1111/1365-2664.12651

Vu L V., Bonebrake TC, Vu MQ, Nguyen NT (2015) Butterfly diversity and habitat variation in a disturbed forest in northern Vietnam. Pan-Pac Entomol 91:29–38. doi: 10.3956/2014-91.1.029

Walker LE, Marzluff JM (2015) Recreation changes the use of a wild landscape by corvids. Condor 117:262–283. doi: 10.1650/CONDOR-14-169.1

Wang M, Chen Q, Kuerbanjiang H, et al (2015) Group size and disturbance effects on group vigilance in the Great Bustard Otis tarda in western China. Bird Study 62:438–442. doi: 10.1080/00063657.2015.1047736

Ware HE, McClure CJW, Carlisle JD, Barber JR (2015) A phantom road experiment reveals traffic noise is an invisible source of habitat degradation. Proc Natl Acad Sci 112:12105–12109. doi: 10.1073/pnas.1504710112

Webb SL, Dzialak MR, Kosciuch KL, Winstead JB (2013) Winter Resource Selection by Mule Deer on the Wyoming–Colorado Border Prior to Wind Energy Development. Rangel Ecol Manag 66:419–427. doi: 10.2111/REM-D-12-00065.1

Whitworth A, Beirne C, Rowe J, et al (2015) The response of faunal biodiversity to an unmarked road in the Western Amazon. Biodivers Conserv 24:1657–1670. doi: 10.1007/s10531-015-0883-y

Wiącek J, Polak M, Kucharczyk M, Bohatkiewicz J (2015) The influence of road traffic on birds during autumn period: Implications for planning and management of road network. Landsc Urban Plan 134:76–82. doi: 10.1016/j.landurbplan.2014.10.016

Wiebe PA, Fryxell JM, Thompson ID, et al (2013) Do trappers understand marten habitat? J Wildl Manage 77:379–391. doi: 10.1002/jwmg.471

Wilson A, Fenton B, Malloch G, et al (2016) Urbanisation versus agriculture : a comparison of local genetic diversity and gene flow between wood mouse Apodemus sylvaticus populations in human-modified landscapes. 87–97. doi: 10.1111/ecog.01297

Winston ME, Herz H (2015) Unpaved roads alter foraging patterns of the leafcutter ant Atta colombica. Stud Neotrop Fauna Environ 50:57–64. doi: 10.1080/01650521.2015.1020702

Yahya MS, Puan CL, Azhar B, et al (2016) Nocturnal bird composition in relation to habitat heterogeneity in small scale oil palm agriculture in Malaysia. Agric Ecosyst Environ 233:140–146. doi: 10.1016/j.agee.2016.09.003

Yang X, Slabbekoorn H (2014) Timing vocal behavior : Lack of temporal overlap avoidance to fluctuating noise levels in singing Eurasian wrens. Behav Processes 108:131–137. doi: 10.1016/j.beproc.2014.10.002

Yrjölä RA, Santaharju JLM (2015) The Impact of Road Construction on a Community of Farmland Birds. Ann Zool Fennici 52:33–44. doi: 10.5735/086.052.0203

Zhang M, Cheong K, Leong K, Zou F (2012) Effect of traffic noise on black-faced spoonbills in the TaipaColoane Wetland Reserve, Macao. Wildl Res 39:603–610. doi: 10.1071/WR12060

Zimmerman M, Oddy D, Stolen E, Breininger D (2015) Microspatial sampling reveals cryptic influences on gene flow in a threatened mammal. Conserv Genet 16:1403–1414. doi: 10.1007/s10592-015-0749-6

Zimmermann B, Nelson L, Wabakken P, et al (2014) Behavioral responses of wolves to roads : scale-dependent ambivalence. 25:1353–1364. doi: 10.1093/beheco/aru134
